# Supplementary material for: Kinematics of subduction in the Ibero-Armorican arc constrained by 3D microstructural analysis of garnet and pseudomorphed lawsonite porphyroblasts from Ile de Groix (Variscan belt)
Source: Copernicus journal article supplement (doi:10.5194/se-2020-175), 2020-10-19
Supplement: Supplementary file [file se-2020-175-AC1-supplement.pdf]

1 **Kinematics of subduction in the Ibero-Armorican arc constrained by 3D**  
2 **microstructural analysis of garnet and pseudomorphed lawsonite porphyroblasts**  
3 **from Ile de Groix (Variscan belt)**

4  
5  
6 Domingo G.A.M. Aerden<sup>a,b</sup>

7 Mohammad Sayab<sup>d</sup>

8 Aidan Forde<sup>c</sup>

9 Alejandro Ruiz-Fuentes<sup>a</sup>

10  
11 <sup>a</sup>Departamento de Geodinámica, Universidad de Granada, Spain

12 <sup>b</sup>Instituto Andaluz de Ciencias de la Tierra, CSIC/Universidad de Granada, Spain

13 <sup>c</sup>Saorgus Energy Ltd, Kerry, Ireland

14 <sup>d</sup>Geological Survey of Finland, Espoo, Finland

15  
16 **Abstract**

17  
18 The small island of Groix in southern Brittany, France, is well known for its exceptional  
19 preservation of outcrops of Variscan blueschists, eclogites and garnetiferous micaschists that  
20 define a Late-Devonian suture between Gondwana and Armorica. The kinematics of  
21 polyphase deformation in these rocks is reconstructed based on 3D microstructural analysis of  
22 inclusion trails in garnet- and pseudomorphed lawsonite porphyroblasts using multiple,  
23 differently oriented thin sections of single samples and X-ray tomography. Three sets of  
24 inclusion trails striking NE-SW, NNW-SSE and WNW-ESE are recognized and interpreted to  
25 witness a succession of different crustal shortening directions orthogonal to these trends. The  
26 curvature sense of sigmoidal- and spiral-shaped inclusion trails of the youngest set is shown  
27 to be consistent with northward subduction of Gondwana under Armorica causing southward  
28 thrusting, provided that these microstructures developed by overgrowth of actively forming  
29 crenulations instead of the previously envisaged 'snowball' mechanism. The latter predicts an  
30 opposite thrusting direction which is at odds with the regional tectono-metamorphic zonation  
31 in the Ibero-Armorican Arc. Strongly non-cylindrical folds locally found on Ile de Groix are  
32 reinterpreted as fold-interference structures instead of having formed by progressive shearing.  
33 Six additional samples of lower-grade footwall units of the Groix ophiolite were also studied.  
34 The oldest inclusion trails in these rocks have similar trends as the youngest one in Ile de  
35 Groix, but formed later during the Carboniferous. Our new inclusion-trail data for southern  
36 Brittany bear a strong resemblance with those documented previously in the north-western  
37 Iberian Massif and suggest about 20° clockwise rotation of Iberia during the early Cretaceous  
38 opening of the Gulf of Biscay.

39  
40 Key words: porphyroblast inclusion trails, FIA, Variscan subduction, Ibero-Armorican arc, Ile  
41 de Groix.

42  
43 **1. Introduction**

44  
45 Kinematic reconstructions in polydeformed metamorphic regions are traditionally  
46 based on a combination of geological mapping, study of structural relationships in outcrop  
47 and corresponding orientation measurements, study of thin sections which are usually cut  
48 parallel to the stretching lineation to determine a shear sense, and geochronological data for  
49 pre- and syn-tectonic minerals. Not rarely does this approach produce paradoxical results that  
50 insufficiently constrain different possible tectonic models. However, following a major  
51 conceptual shift concerning the formation mechanism and tectonic significance of

52 porphyroblast inclusion trails (Bell et al., 1985, 1986; Bell & Johnson, 1989), a number of  
 53 studies have shown how quantitative microstructural data for such microstructures can  
 54 significantly improve the resolution of deformation histories whose complexity was  
 55 previously not even recognized (e.g. Bell et al., 1998; Bell & Welch, 2002; Sayab, 2005; Ali,  
 56 2010; Shah et al., 2011; Aerden, 2013; Kim & Ree, 2013; Abu-Sharib & Sanislav, 2013;  
 57 Aerden & Sayab, 2017). Aerden (2004) pioneered this approach in Variscan NW Iberia in a  
 58 research project led by José Ramón Martínez Catalán and Ricardo Arenas (e.g. Martínez  
 59 Catalán et al., 2000). He distinguished 4 inclusion-trail sets with specific, regionally  
 60 consistent trends and relative timing. An E-W trend of the earliest formed set was interpreted  
 61 to record N-S directed compression and subduction with unknown polarity. Subduction would  
 62 have been followed by several changes in the direction of crustal shortening responsible for  
 63 the 3 younger sets of inclusion trails. The youngest two sets with NE-SW and WNW-ESE  
 64 trends were correlated with regional-scale fold-interference patterns developed throughout the  
 65 Iberian Massif and this, in turn, was key to rediscovering a partially blind orocline in central  
 66 Iberia, which was later endorsed by Martínez Catalán et al. (2012).

67 Here, we report a similar study of inclusion trails in the Armorican Massif focusing on  
 68 high-pressure metabasites of Ile de Groix, but also including data from lower-grade rocks  
 69 located in their footwall. The island of Groix (ca. 15 km<sup>2</sup>) is a national reserve with excellent  
 70 coastal outcrops of Variscan blueschists, eclogites and interlayered garnetiferous micaschists  
 71 that are generally accepted to represent the remains of a narrow ocean that, in the late Silurian  
 72 and lower Devonian separated Gondwana in the south from the Armorica microplate to the  
 73 north. In NW-Iberia, a similar ophiolitic unit is since long recognized and correlated with the  
 74 one exposed on Groix island (Arenas et al., 1995; Diaz-García et al., 1999; Ballèvre et al.,  
 75 2009, 2015). Closure of this ocean involved subduction of the margin of Gondwana causing  
 76 high-pressure metamorphism dated 370-360Ma on Ile de Groix (Bosse et al., 2005). The  
 77 polarity and kinematics of ophiolite emplacement have remained poorly constrained by  
 78 (micro)structural data. Indeed, not much has changed since Quinquis et al. (1978) wrote: "*the*  
 79 *bulk sense of shear on Groix has not yet been determined unequivocally, but may perhaps be*  
 80 *deduced from systematic analyses of fold asymmetry and of microstructures in and around*  
 81 *syntectonic garnets. The significance of glaucophane orientation in the basic rocks of Groix*  
 82 *also needs to be studied: the orientation is extremely variable and may not be simply related*  
 83 *to a shear direction.*"

84 Precisely along these lines of suggested further research, we performed detailed 3D  
 85 microstructural analysis, using oriented thin sections and X-ray tomography, of 10  
 86 garnetiferous blueschist samples of Ile de Groix, 4 samples of albite-porphyroblast bearing  
 87 greenschists (Pouldu schists) cropping out along the coast of the mainland, and 2 kyanite-  
 88 staurolite schists collected inland from the North-Armorican Zone (Fig. 1). Integration of the  
 89 new data with that of previous field-based studies, and the above cited shear sense criteria  
 90 provides a coherent picture of a complex deformation history hidden behind the false  
 91 appearance of a simple L-S fabric. Implications for the mechanism of sheath folds (Ile de  
 92 Groix is one of the main type locations for these structures) and for kinematics of Variscan  
 93 subduction are also presented.

94

## 95 2. Geological setting and previous work

96

97 The Variscan (or Hercynian) orogeny took place in the Devonian and Carboniferous  
 98 as a consequence of Gondwana-Laurussia convergence with 2 microcontinents occupying  
 99 intermediate positions known as Armorica and Avalonia (e.g. Matte, 2001). The resulting  
 100 closure of oceanic domains created multiple ophiolitic sutures whose precise location, timing  
 101 and correlation continues to be a major research topic (e.g. Azor et al., 2008; Faure, 2008;  
 102 Ballèvre et al., 2009; Arenas et al., 2016). The high-pressure rocks of Ile de Groix are part of

103 a partially submerged ophiolitic klippen belonging to a thrust nappe that separates Armorican  
 104 crustal units in the hangingwall, outcropping to the North- and Central Armorican Domains,  
 105 from North-Gondwana derived crustal units below the suture outcropping in the South  
 106 Armorican Domain and NW Iberia (Fig. 1). Because of this regional-scale zonation, a north-  
 107 dipping subduction zone associated with south verging thrusts has been considered the most  
 108 likely geodynamic scenario (Matte, 2001; Faure et al., 2008; Ballèvre et al., 2009; Ballèvre  
 109 2015). However, structural data have not allowed to independently confirm this model and in  
 110 fact have yielded conflicting results.

111 Lagarde (1980) concluded NW directed thrusting from shear criteria in the  
 112 Champtoceaux Complex (Fig. 1), implying south-east subduction. A similar kinematic was  
 113 deduced on Ile de Groix by Quinquis (1980), Quinquis & Choukroune (1981) and Cannat  
 114 (1985) from rotated snowball garnets and quartz c-axes fabrics. Recognizing the conflict with  
 115 respect to northward subduction, these authors proposed that this shear sense corresponds to  
 116 backthrusting and obduction of ophiolites in opposite direction as subduction.

117 Quinquis (1980), however, noticed that shear bands (C and C' planes) on Ile de Groix  
 118 indicate opposite shear senses that cannot be clearly linked to different metamorphic  
 119 conditions and therefore were interpreted as conjugate sets. Shelley and Bossière (1999)  
 120 reported opposite shear senses also indicated by quartz fabrics studied in 57 oriented samples.  
 121 This led them to conclude bulk vertical shortening in Ile de Groix related to crustal thinning.  
 122 In contrast, Philippon et al. (2009) recently argued for a consecutive origin of opposite shear-  
 123 bands in Ile de Groix. The older set would have developed during prograde metamorphism  
 124 and top-to-the SW (N140) shearing, followed by a younger recording quasi-opposite top-to-  
 125 the-north (N350) shearing during retrogression.

126

### 127 **3. Inclusion-trail data from thin sections**

128

129 A total of 132 oriented thin sections were studied of 33 samples: 20 from Ile de Groix,  
 130 9 from the Pouldu schists and an equivalent unit in the Baye d'Audièrme (Tréogat formation),  
 131 and 4 from the Central Armorican Zone (Fig. 1). Initially, a single horizontal thin section was  
 132 cut of each sample to assess the interest of the rock for further study and to measure the strike  
 133 of inclusion trails. The latter only proved possible in about half of the samples, the other half  
 134 containing garnets that are too altered or whose inclusion trails are too poorly developed.  
 135 Seven Ile de Groix samples containing the most promising inclusion trails were further  
 136 studied in 6 vertical thin sections striking N0, N30, N60, N90, N120 and N150 aimed at  
 137 determining inclusion-trail curvature axes also known as 'FIA' ('Foliation Intersection- or  
 138 Inflexion-Axes'; Bell et al., 1992; Bell et al., 1995; Stallard et al., 2003; Kim & Sanislav,  
 139 2017). Five Ile-de-Groix samples (G3, G11, G12, G14 and G20) were studied in even greater  
 140 detail using X-ray computed tomography (XCT) allowing study of virtual sections of any  
 141 orientation and location in scanned rock volumes, as well as quantitative analysis of the 3D  
 142 shape of different minerals and their preferred orientations.

143

#### 144 *3.1. Preferred orientations of inclusion trails and genetic implications*

145

146 Inclusion trail strikes were measured in 10 samples from 3 main areas in Ile de Groix  
 147 (Fig. 2a) and plotted in moving-average rose diagrams made with the Excel Workbook  
 148 MARD (Munro & Blenkinsop, 2012; Fig. 2b). The matrices of these rocks contain a  
 149 mineral/stretching lineation that, although locally exhibiting significant variation, overall  
 150 trends N-S in the south-east of the island, changing gradually to NW-SE further north and  
 151 west. Bosse et al. (2002) inferred a thrust contact separating garnetiferous eclogites,  
 152 blueschists and micaschists in the eastern half of the island from underlying lower-grade  
 153 (albite-epidote facies) rocks outcropping in the western half (Triboulet, 1974; Schulz, 2001).

154 In the eastern part of the island, stretching lineations are associated with a gently dipping or  
 155 subhorizontal foliation so that shearing-induced porphyroblast rotation can be expected to  
 156 have resulted in inclusion trails broadly striking orthogonal to the lineation (Fig. 3a). Our  
 157 measurements, however, show precisely the opposite: a NNE-SSW maximum of inclusion-  
 158 trail strikes subparallel to the stretching lineation. This is only a first indication that the classic  
 159 interpretation of internal foliations based on Zwart (1960), Spry (1963) or Roosenfeld (1970)  
 160 may not be applicable and that the alternative model of Bell (1985), Bell et al. (1986) and Bell  
 161 & Johnson (1989) has to be considered, according to which sigmoidal and spiral-shaped  
 162 inclusion trails form by punctuated overgrowth of one or multiple crenulation cleavages by  
 163 non-rotating porphyroblasts (Fig. 3b). The lack of rotation results from the preferential  
 164 nucleation of porphyroblasts in microlithon domains and the partitioning of shearing  
 165 components in surrounding cleavage planes. Thus, FIA represent 'fossil' crenulation axes in  
 166 this model and this explains FIAs being commonly parallel to crenulation- and fold-axes in  
 167 the matrix (Aerden, 1995, 2004, 1998, Sayab, 2005, Aerden et al., 2013; Bell & Sanislav,  
 168 2011).

169 Additional support for a 'non-rotational' origin of the inclusion trails of Groix Island is  
 170 provided by internal truncations within garnets of samples G7 and G14 (Fig. 4). These exhibit  
 171 similar subvertical and subhorizontal preferred orientations as reported in other metamorphic  
 172 belts (e.g. Bell et al., 1992; Hayward, 1992; Aerden, 1994, 1998, 2004; Mares, 1998; Bell &  
 173 Sapkota, 2012; Sayab, 2005; Shah et al., 2009; Aerden and Ruiz Fuentes, 2020), where it is  
 174 interpreted to witness alternating compression and (synorogenic) gravitational collapse. We  
 175 are unaware of any alternative explanation for this data.

176

### 177 *3.2. Inclusion-trail curvature sense and implications for subduction polarity*

178

179 Quinquis & Choukroune (1981) reported that out of a total of 29 thin sections they  
 180 studied, presumably cut parallel to the stretching lineation, 26 contained sigmoidal or spiral-  
 181 shaped inclusion trails that would indicate top-to-the north shearing. Since they assumed the  
 182 traditional 'rotational' model, it follows that their inclusion trails predominantly curve  
 183 anticlockwise when viewed in westward direction. In effect, we found the same predominance  
 184 in our samples after counting the number of clockwise vs. anticlockwise trails in all vertical  
 185 thin sections striking N-0, N30, N120 and N150, that is is, in all thin sections lying at a small  
 186 angles with the regional stretching lineation. This resulted in 99 anticlockwise and 27  
 187 clockwise inclusion trails (viewing westward); a ratio of about 4:1.

188 Most workers agree that the general tectono-metamorphic zonation in the Ibero-  
 189 Armorican Arc is best explained in terms of a northward subduction of Gondwana below  
 190 Armorica-Avalonia and hence south-verging thrusting. In order to reconcile this with top-to-  
 191 the-north shearing apparently indicated by 'rotated' porphyroblasts, Quinquis & Choukroune  
 192 (1981) envisaged a geodynamic model including major backthrusting and obduction in the Ile  
 193 de Groix, contrary to the direction of subduction. However, a 'non-rotational' interpretation of  
 194 the same inclusion trails they studied resolves the problem without need for this rather *ad-hoc*  
 195 solution as the model predicts north-side-up shearing on vertical foliations alternating with  
 196 top-to-the south shearing on horizontal foliations compatible with north directed subduction  
 197 (Bell & Johnson, 1989, their Figs. 16 and 17). Therefore, the curvature sense of inclusion  
 198 trails in Ile de Groix is an extra argument in favour of the 'non-rotational' model.

199

### 200 *3.3. Average FIA trends measured from radial thin-section sets*

201

202 Hayward (1990) devised a method for determining the average orientation of FIAs in a  
 203 sample using sets of radially cut thin sections with regular angular spacing. The method  
 204 exploits the fact that asymmetric inclusion-trails (or folds) exhibit either an S- or Z-

205 asymmetry in cross-section depending on the orientation of the section relative to the fold- or  
 206 inclusion-trail axes. This allows the average trend of FIAs defined by sigmoidal or spiral-  
 207 shaped trails in a sample to be constrained between the strikes of thin-sections exhibiting  
 208 opposite asymmetries of these microstructures. Once the FIA trend is known, the average  
 209 plunge can also be determined by cutting a new radial set of thin sections, this time about a  
 210 horizontal axes oriented normal to the FIA trend. The method was refined by Bell et al.  
 211 (1995) to potentially allow determination of multiple FIA sets in samples with complex  
 212 deformation histories.

213 We successfully applied the method to 5 Ile de Groix samples. The average FIAs for  
 214 these are given in Fig. 2b as pie-cake symbols. All were constrained to within 30° trend  
 215 ranges, but 10° for sample G7 as 2 extra thin sections were cut with 10° spacing. The plunge  
 216 direction could also be determined from the asymmetry of inclusion trails in the horizontal  
 217 thin sections, but the plunge angle was not further constrained because of the large amount of  
 218 extra thin sections and time this would have required. The method did not produce results in  
 219 samples G18, G19 and G20, which contain relatively few porphyroblasts with inclusion trails  
 220 that show inconsistent asymmetries in some thin sections. X-ray data for G20 presented  
 221 further suggest that this inconsistency is due to the presence of 2 differently oriented sets of  
 222 FIA sets that could not be resolved with thin sections. Samples G3, G13 and G15 mostly  
 223 contain garnets with straight inclusion trails and too few asymmetric ones to confidently  
 224 apply the technique.

225

### 226 *3.4. Mainland samples: Pouldu schists, Tréogat formation and Central Armorican Domain*

227

228 The 'Pouldu schists' are greenschists of volcano-sedimentary origin cropping out along  
 229 the southern coast of mainland Brittany (Triboulet, 1992; Fig. 1). Inclusion-trails preserved  
 230 within abundant albite porphyroblasts in this unit were measured in 3 samples (PO2, PO3,  
 231 PO5) and in a fourth sample (AU-1) of similar rocks cropping out in the Baye d'Audièrne  
 232 (Tréogat Formation; Luck et al., 2002). Inclusion-trails in all these samples broadly strike E-  
 233 W (Fig. 2b), subparallel to the generally steeply dipping macroscopic cleavage. A N060  
 234 striking crenulation cleavage is visible in the matrix of PO2 and PO5 (Fig. 2c).

235 N-S striking vertical thin sections of PO2, PO3 and PO5 show that the main foliation  
 236 ('S2' in Fig. X1a) itself crenulates an older fabric (S1) and inclusion-trail geometries  
 237 indicative of porphyroblast growth syn- to post-D2 (Fig. X1b). Radiometric ages of 330-  
 238 320Ma obtained for nearby granites affected by S2 (Béchenec et al., 2012) imply that these  
 239 inclusion trails formed in the Carboniferous and hence post-date the ones of Ile de Groix  
 240 where metamorphism peaked in the Late-Devonian (360-370Ma; Bosse et al., 2005).

241 Two staurolite-kyanite schists from the Central Armorican Domain located about 5km  
 242 NNE of Quimper were also studied but only in horizontal thin sections. The age of  
 243 metamorphism in these rocks is roughly constrained by granite ages to the period of 350-  
 244 320Ma (Schulz et al., 1998). The broadly N060 trend of inclusion trails in these samples (Fig.  
 245 2d) suggests a correlation with the late earlier mentioned N060 crenulation cleavage in the  
 246 Pouldu schists.

247

## 248 **4. Inclusion-trail data from X-ray tomography**

249

### 250 *4.1. Data acquisition and processing method*

251

252 X-ray computed tomography (XCT) scans were acquired at the University of Granada  
 253 with an Xradia 510 (Versa Zeiss) microtomographer at resolutions of 13-15 um using 140kV  
 254 voltage and 2500-3200 projections. Four thin-section blocks measuring 10-15 cm<sup>3</sup> were  
 255 scanned of samples G3, G11, G12, and G14 plus a more irregular piece of G20 of similar

256 volume. Geographic orientation arrows made of metal wire were stuck on the samples to aid  
 257 reorientation of the Tiff image-stacks generated by the scanner such that geographic north  
 258 coincides with the Y-axes, and true vertical with the Z-axes. Image stacks were processed  
 259 with the Fiji software package (Schindelin et al., 2012). After reorientation, the spatial  
 260 orientation of all straight inclusion-trails or inclusion-trail segments visible in the stacks were  
 261 determined by recording the strike and pitch of these microstructures as seen in XY-, YZ- and  
 262 XZ-slices, then plotting these angles in a stereonet and fitting them to great circles.

263 Furthermore, the curvature axes of sigmoidal or spiral-shapes inclusion-trails (FIA)  
 264 were measured by slicing individual porphyroblasts in radial patterns, analogous to the radial  
 265 thin-sectioning technique of Hayward (1990) and Bell et al. (1995) already described in  
 266 section 6. The trend of the FIA defined by sigmoidal or spiral-shaped trails is first constrained  
 267 by interactively rotating a vertical slice about a vertical axes through the porphyroblast and  
 268 recording where the switch of inclusion-trail curvature sense occurs. Once the FIA trend is  
 269 determined, a horizontal slice is interactively rotated about a horizontal axes trending normal  
 270 to the FIA trend and allows to constrain the FIA plunge and plunge direction from a similar  
 271 asymmetry switch.

272 The 3D image stacks also allowed us to study preferred orientations of both garnet  
 273 porphyroblasts and relatively large opaque minerals present in all 5 samples. The BoneJ  
 274 plugin of Fiji (Doube et al., 2010) was used for this purpose. This plugin allows rapid  
 275 calculation of best-fit ellipsoids for a large number of 'objects' in a binary (black & white)  
 276 image stack. Image stacks were first segmented by thresholding top, only leaving the range of  
 277 grey-scale values corresponding to garnet or opaque minerals, and then binarized (i.e. all grey  
 278 tones are set to black). Subsequently, a size-filter was applied to remove small particles and in  
 279 some cases the 'dilate' tool in order to re-join parts of single garnets that had become  
 280 separated during thresholding due to the presence of fractures and related alteration. In all  
 281 samples studied except G20 this procedure revealed strong preferred orientations of opaque  
 282 minerals but not of garnets, whereas in sample G20 the reverse situation was found with only  
 283 preferred orientation of garnets. The following subsections describe our main microstructural  
 284 results for each sample in detail.

#### 285 286 4.2. *Sample G11* 287

288 G11 is a blueschist from 'Amer' in the SE of the island (Fig. 2a). It contains garnet  
 289 porphyroblasts as well as rectangular pseudomorphs probably after lawsonite composed of a  
 290 mixture of white mica, chlorite, albite and epidote (Cogné et al., 1966; Felix & Fransolet,  
 291 1972; Ballèvre et al., 2003). Lawsonite relics have never been found, though, and some  
 292 authors have argued that the replaced mineral could have been plagioclase (Shelley &  
 293 Bossière, 1999). Lawsonite, is a high-pressure mineral and should have grown partially  
 294 synchronous with garnet on a prograde path, whereas plagioclase is more likely to have  
 295 formed during retrogression. Thus, the relative timing of the pseudomorphed mineral relative  
 296 to garnet growth is highly relevant to this question.

297 Inclusion trails in garnet porphyroblasts of G11 vary from simple to sigmoidal to  
 298 spiral-shaped but never curve more than about 90° from the centre to the rim (Figs. 5a, b, c, g  
 299 and 6). The X-ray scan also revealed relatively large elongate crystals with high X-ray  
 300 attenuation (higher than garnet) and hence density, which in thin section were identified as  
 301 Fe-rich opaques partially or completely replaced by brown-reddish goethite (Fig. 5d, h). Some  
 302 of these opaques attain porphyroblastic sizes and contain scarce silicate inclusions. Reflected-  
 303 light imaging showed that the opaque phase is a mixture of ilmenite and magnetite, the latter  
 304 possibly replacing the former. Best-fit ellipsoids calculated for these crystals with *BoneJ* (see  
 305 section 7.1.) have their long-axes (X) strongly aligned with the macroscopic

306 mineral/stretching/intersection lineation, whereas XY planes lie in the plane of the matrix  
307 foliation (Fig. 6).

308 Sigmoidal- or spiral-shaped inclusion trails were measured both in the centre and in  
309 the rims where they become sharply deflected or truncated by younger inclusion trails. The  
310 porphyroblast-rim measurements tightly define a steeply SW dipping plane, whereas  
311 porphyroblast-core foliations vary significantly from steeply NE dipping to shallowly W-  
312 dipping. The intersection lines of core- and rim inclusion-trail planes agree well with 10 FIAs  
313 that were measured independently with the above mentioned radial-slicing technique. Simple  
314 (straight) inclusion trails have variable orientations that coincide either with the ones in the  
315 cores or the rims of porphyroblasts with sigmoidal and spiral-shaped trails.

316 Based on this data it can be confidently interpreted that the bimodal inclusion-trail  
317 strikes seen in the rose diagram for G11 in Fig. 2b represent two sets of inclusion trails: an  
318 older set striking NNW-SSW and a younger one striking WNW-ESE. The FIAs measure in  
319 individual porphyroblasts also confirm the average FIA that was initially determined using  
320 thin sections (Fig. 2b).

321 Lawsonite pseudomorphs in G11 also exhibit visible inclusion trails in the X-ray scan  
322 (Fig. 5e, f, and h) although less finely defined as in garnet. They have a straight to weakly  
323 sigmoidal geometry oblique to the matrix foliation and are subparallel to the inclusion trails  
324 of garnet-rims suggesting that the pseudomorphed mineral grew synchronous with garnet rims.  
325 This agrees with earlier reported garnet inclusions within the pseudomorphs (e.g. Ballèvre et  
326 al., 2003). Thus our new microstructural evidence for synchronous growth with garnet rims  
327 supports prograde lawsonite growth rather than retrograde plagioclase. The asymmetry or  
328 curvature sense of inclusion trails in the pseudomorphs is opposite as in garnets viewed in N-  
329 S vertical sections, implying a change from top-to-the south shearing during the growth of  
330 garnet cores, to top-to-the north shearing during formation of garnet rims and lawsonite, as  
331 further discussed in section 6.3.

332

#### 333 4.3. *Sample G12*

334

335 G12 is a similar blueschist as G11 and from the same outcrop in which one possible  
336 lawsonite pseudomorphs could be identified in X-ray scan but not clearly showing an internal  
337 fabric. The tomographic data for this sample reveal an early NNW-SSE striking foliation  
338 preserved in porphyroblast cores and as simple inclusion trails, which was overprinted by a  
339 steeply S-dipping foliation preserved in garnet rims (Fig. 6). The garnet-rim foliation is in  
340 turn deflected or truncated by a subhorizontal crenulation cleavage that causes transposition in  
341 the matrix and constitutes the composite macroscopic foliation. The same opaque minerals as  
342 described in G11 are present in the matrix but in this case also as relatively large inclusions  
343 within garnets, often occupying a central position suggesting that the garnets nucleated on  
344 those grains. Best-fit ellipsoids demonstrate strong elongation of the matrix opaques in NW-  
345 SE direction, subparallel to the strike of inclusion trails in garnets and the macroscopic  
346 lineation.

347 These data allow to correlate the different peaks exhibited by the rose diagrams for  
348 inclusion-trail strikes in G11 and G12 (Fig. 2b). These peaks correspond to (1) an early NE-  
349 SW striking foliation which preserved in the cores of spiral-shaped inclusion trails, (2) a  
350 younger NNW-SSE striking foliation included in the cores of sigmoidal inclusion trails with  
351 variable dip angles, and (3) a still younger ESE-WNW foliation preserved in garnet rims and  
352 in lawsonite pseudomorphs. It is noteworthy that, in spite of the similar microstructural  
353 evolution of G11 and G12, the average FIA trends that were initially determined for both  
354 samples differ significantly and without the tomographic data would have been probably  
355 misinterpreted as corresponding to different deformation periods.

356

#### 357 4.4. *Sample G14*

358

359 G14 is another blueschist sample from Amer containing numerous relatively small (1-  
360 2 mm) garnets with straight, sigmoidal or spiral-shaped inclusion-trails. The spiral patterns  
361 exhibit significantly greater curvature (up to 180°; Fig. 4b) as in G11 and G12. Unfortunately,  
362 only a few garnets had clearly visible inclusion trails in the tomographic scan because of their  
363 very fine grain size and profuse fracturing of garnets. A few inclusion-trail planes could be  
364 measured plus 5 FIAs that plunge steeply in different directions (Fig. 7a).

365 Elongate opaque crystals similar as present in G11 and G12 align with the  
366 macroscopic stretching/mineral lineation. Their XY planes have variable dips but consistent  
367 N-S to NE-SW strikes parallel to that of most inclusion-trails (Fig. 2b). An interesting fold  
368 structures outlined by an epidote-rich layer was found, whose axial trace also trends NE-SW  
369 suggesting a genetic link with the inclusion trails that is further supported by the 3D  
370 microstructural data (Fig. 7a). E-W sections through the fold (Fig. 7c) show that it was  
371 refolded with a subhorizontal axial plane probably when the horizontal crenulation cleavage  
372 in sample G7 developed (Fig. 4a). In plan view, the fold is transected by N-S striking  
373 cleavage zones accentuated by irregularly folded quartz lenses (Fig. 7d).

374

#### 375 4.5. *Sample G3*

376

377 G3 was collected close to Fort Nosterven on the east coast of the island, about 1 km south of  
378 G7 from Plage du Trech. Garnets in this glaucophane-epidote schist have well developed  
379 straight and sigmoidal inclusion trails whose strikes were measured in thin section.  
380 Unfortunately, the trails were poorly visible in the tomographic scan. The few that could be  
381 measured dip steeply NW, similar as the inclusion trails in garnet cores of samples G11 (Fig.  
382 8a; compare with Fig. 6). A correlation can also be proposed with average FIA trend  
383 determined in sample G7 (Plage du Trech) from radial thin sections and with the gently SSW  
384 plunging folds measured there by Audren (1974, unpublished data; Fig. 8b). One garnet FIA  
385 defined by sigmoidal inclusion trails could be constrained by radial slicing. Inclusion-trails in  
386 the rim of this porphyroblast are approximately subvertical with N120 strike and hence can be  
387 correlated with the garnet-rim inclusion trails of G11 and G12.

388

#### 389 4.6. *Sample G20*

390

391 G20 was collected at Port Lay on the central-north coast (Fig. 2) where the  
392 macroscopic cleavage dips about 50° NE associated with a subhorizontal mineral lineation  
393 parallel to fold axes. Despite numerous (>100) garnets in the scanned volume, only 6 FIAs  
394 could be determined with confidence for sigmoidal inclusion trails. Five of these plunge  
395 moderately NE and correspond to the intersections between early NE-SW striking inclusion  
396 trails and a younger set of NW-SE striking ones, subparallel to the macroscopic cleavage. The  
397 6th FIA is subhorizontal with NW-SE trend and must have formed later by inclusion of the  
398 younger set of inclusion trails.

399 Abundant opaque minerals in the sample conspicuously cluster around garnet crystals  
400 suggesting a genetic relationship, but best-fit ellipsoids calculate from them did not reveal  
401 significant preferred orientation and their axial ratios are also lower as in other samples. In  
402 contrast, best-fit-ellipsoids for garnet porphyroblasts did confirm a strong preferred shape  
403 orientation already appreciable by eye with garnet long-axes (X\_Gt) subparallel to fold axes,  
404 mineral lineation, and the late subhorizontal FIA (Fig. 8c). Aerden & Ruiz-Fuentes (2020)  
405 and Aerden et al. (Submitted manuscript, Tectonics) recently showed that garnets commonly  
406 grow elongate normal or parallel to their FIA, and explained this in terms of preferential  
407 nucleation of porphyroblasts in actively forming microlithon domains, whose ellipsoidal



408 shapes are mimicked by the garnet. In G20, all 6 measured FIAs lie within the set of younger  
 409 inclusion trail planes and macroscopic foliation. The 5 older FIAs (NE plunging) are hosted  
 410 by garnets that are elongate in the direction of the the stretching lineation. The younger  
 411 (subhorizontal) FIA is parallel to the stretching lineation but the corresponding garnet long  
 412 axis plunges NE suborthogonal to the stretching lineation. In principle, one could consider the  
 413 possibility that the elongate porphyroblasts in G20 rotated towards the flow plane and  
 414 stabilized their position once they reached a small angle with it (Pennacchioni et al., 2000;  
 415 Ceriani et al., 2003). However, the average axial ratio of the garnets ( $R=2.1$ ) is well below the  
 416 reported threshold value of  $R>3$  for stabilization to occur, and apart from that the model does  
 417 not explain the shape elongation in the first place.

418

## 419 5. Tectonic interpretation

420

421 Evidence has been presented for 3 sets of differently oriented inclusion-trails in Ile de  
 422 Groix, which we interpret to witness 3 episodes of crustal shortening perpendicular to the  
 423 their strikes. Although the ratios of clockwise vs. anticlockwise trails could not be resolved  
 424 for each set separately, it is likely that in thin sections striking N330, N0, N30 and N60 this  
 425 ratio is determined mainly by the oldest (NE-striking) and youngest (E-W striking) sets as  
 426 these intersect the thin section at a high angle. The intermediate inclusion-trail set strikes  
 427 subparallel or at a low angle to the same thin sections and can be expected to produce  
 428 inconsistent curvature senses (cf. Hayward, 1990). Indeed, this may be the reason why about  
 429 25% of all counted garnet porphyroblasts exhibit opposite curvature (i.e. clockwise) as the  
 430 others. Therefore, the oldest NE-SW striking inclusion trails are interpreted to witness early  
 431 NW directed subduction. The polarity of an intermediate subduction stage has not been  
 432 determined from inclusion trails, but was probably towards the WSW (cf. Martinez Catalán et  
 433 al., 1997). The asymmetry of the youngest WNW-ESE striking trails (included in garnet rims  
 434 of G11 and G12) corresponds the latest stages of northward subduction, followed by  
 435 exhumation. All internal fabrics probably formed during a single prograde path reaching peak  
 436 conditions of about 18–20 kbar, 450 °C (Ballèvre, 2003 and references cited therein). Schulz  
 437 et al, (2001) presented interpreted 2 metamorphic cycles that perhaps merit further study with  
 438 relation to the multiple generations of garnet porphyroblasts and FIAs distinguished herein.

439 The average dip of all 106 inclusion-trail planes measured in 6 samples with X-ray  
 440 tomography is  $57^\circ$  ( $\sigma=21^\circ$ ) and the average plunge of all 32 measured FIAs is  $43^\circ$  ( $\sigma=15^\circ$ ).  
 441 These relatively high dip and plunge angles imply only a minor role of the intermitted  
 442 gravitational phases that are suggested by subhorizontal truncations within garnets of samples  
 443 G14 and G7 (Fig. 4). These events did not significantly rotate pre-existing steeply dipping  
 444 fabrics as that would have resulted in a preponderance of subhorizontal FIAs caused by the  
 445 intersection of subhorizontal and subvertical foliations (e.g. Bell et al., 1995).

446 The penetrative subhorizontal crenulation cleavage in the matrix of G3, G7, G11, G12,  
 447 and G14 is not continuous with the above mentioned subhorizontal truncations and therefore  
 448 must have formed later. Based on what is known about the control of crenulation cleavage  
 449 development on porphyroblast nucleation and growth (e.g. Bell & Hayward, 1991), we  
 450 interpret that incipient development stages of the subhorizontal transposition foliation at  
 451 Groix triggered the growth of lawsonite crystals and the latest stages of garnet growth in  
 452 samples G11 (Fig. X2) both preserving the previous subvertical WNW-ESE striking foliation.  
 453 Porphyroblast growth would have ceased as soon as the newly forming cleavage intensified  
 454 against porphyroblast margins, followed by continued intensification, folding and  
 455 transposition in the matrix.

456 In the eastern half of the island, the subhorizontal crenulation fully transposed older  
 457 fabrics and is responsible for the overall flat-lying position of the macroscopic composite  
 458 cleavage. In lower-grade western Groix the same cleavage appears to be more weakly

459 developed as the main foliation there dips moderately to steeply NE or SW due to upright  
 460 folding. These contrasting structural styles are clearly reflected in the orientation data of  
 461 Cogné et al. (1966) which are compiled in Fig. X3a. Structural relationship between the high-  
 462 grade and lower-grade domains are further clarified by sketches of Cogné et al. (1966) and  
 463 Boudier & Nicolas (1976) of an outcrop at Vallon du Lavoir (central south coast; Fig. 2a)  
 464 showing a decametre-scale upright anticline overprinted by a horizontal crenulation cleavage  
 465 with associated refolding suggesting a component of vertical shortening (Fig. X3c and X3d).  
 466 Indeed, Shelley & Bossière (1999) already deduced vertical shortening from quartz fabrics  
 467 and conjugate shear bands indicating opposite shear senses. The sketch of Cogné et al.'s  
 468 (1966) includes a zone where the horizontal cleavage appears overprinted itself by a steeply  
 469 SE dipping foliation.

470 Samples G18, G19 and G20 were collected at an outcrop in Port Lay (central north  
 471 coast; Fig. 2a) where the main cleavage dips 55° NE without traces of a subhorizontal  
 472 crenulation cleavage. This foliation strike parallel to the younger of 2 sets of inclusion trails  
 473 present in sample G20 (Fig. 8c) suggesting a genetic relationship. Therefore, the main  
 474 foliation at this outcrop is interpreted to predate the subhorizontal transposition cleavage in  
 475 eastern Ile de Groix.

476 The above micro- and macro-structural relationships, summarized in the conceptual  
 477 sketch of Fig. X3b, are consistent with a gravitationally spreading thrust nappe. We envisage  
 478 an emplacement mechanism similar as modelled experimentally by Bucher (1956) or Merle  
 479 (1989), and as proposed earlier for Variscan nappes in the Montagne Noire (Aerden, 1998;  
 480 Aerden & Malavieille, 1999).

481 The steeply dipping E-W striking foliation in the Pouldu schists and associated  
 482 inclusion trails (see section 3.5.) record continued N-S plate convergence during the  
 483 Carboniferous causing shortening in the footwall of the Ile de Groix ophiolitic nappe. This  
 484 deformation could have produced the late chevron-style folds with E-W trending axes  
 485 recognized on Groix island (Fig. X2a).

486

## 487 6. Discussion

488

### 489 6.1. Inclusion trail data vs. structural sequences in the field

490

491 Cogné et al (1966) collected numerous structural data along the entire coast of the  
 492 island and distinguished 3 deformation phases. The first phase corresponds to tight to  
 493 isoclinal folds (called 'fundamental folds') with NW-SE to N-S trends. The second  
 494 deformation caused local refolding of the 'fundamental' folds associated with a SW dipping  
 495 crenulation cleavage striking N130-140. A third set of E-W trending chevron-type folds were  
 496 interpreted as post-metamorphic structures. They reported further that stretching/mineral  
 497 lineations defined by glaucophane prisms exhibit variable relationships with respect to fold  
 498 axes, commonly being parallel with them and apparently coeval, but locally oblique and  
 499 clearly predating the folding, or still elsewhere associated with 2nd-phase folds, in which case  
 500 2 sets of oblique glaucophane lineations were observed (their Fig. 12, p 70).

501 Boudier and Nicolas (1976) distinguished 4 deformation phases (D1-D4), the youngest  
 502 one of which corresponds to the late chevron-type structures of Cogné et al. (1966). D1 refers  
 503 to the mineral-lineation ( $L_1$ ), which they interpreted to have formed with a N120 trend. D2  
 504 and D3 correspond to N165 trending folds that would have partially reoriented  $L_1$ . Thus, an  
 505 opposite relative timing was concluded of N120 vs. N165 trending folds as Cogné et al.  
 506 (1966).

507 The orientation data collected by Boudier and Nicolas (1976) remarkably well match  
 508 the strikes of our 3 sets of inclusion trails (Fig. 9c, 10a). However, our tomographic data for  
 509 G11 and G12 indicate an opposite timing as they deduced for N165- vs. N120-trending

510 fabrics and folds, and hence agree with Cogné et al (1966), and with an unpublished sketch by  
 511 Claude Audren (1974) kept at the 'Maison de la Reserve Naturelle Le Bail' on Ile de Groix  
 512 showing refolding of a N165 lineation by a N120 fold (Fig. 9a). Quinquis & Choukroune  
 513 (1980) endorsed a late origin of N120 folds but considered them post-metamorphic. They  
 514 considered that the N120 orientation maximum of L<sub>1</sub> in Boudier & Nicolas' data (1976) from  
 515 Vallon du Lavoir (Fig. 9c) is not representative for the entire island and has no regional-  
 516 tectonic significance. They predicted instead that, on a regional scale L<sub>1</sub> varies symmetrically  
 517 between N120 and N200 as a consequence of sheath folding driven by top-to-N340  
 518 progressive shearing. However, their ideas were heavily influenced by analogue modelling of  
 519 sheath folds in the lab (Cobbold & Quinquis, 1980) rather than being based on new structural  
 520 or microstructural data.

521 The above outlined contradictory interpretations of folding phases, their original  
 522 orientations and relative chronology are not surprising considering the polyphase nature of  
 523 'L<sub>1</sub>' revealed in this study and indeed recognized earlier by Cogné et al. (1966). This lineation,  
 524 defined by glaucophane, epidote and opaque minerals is associated with at least 3 sets of  
 525 foliations formed at different times with different orientations, but difficult to distinguish in  
 526 the field due to the effects of repeated folding, rotation and transposition.

## 527 6.2. Formation mechanism of sheath folds

528 Based on a detailed study of quartz fabrics in 57 samples, Shelley and Bossière (1999)  
 529 concluded that most folds of Ile de Groix island must nucleated with their axes immediately  
 530 subparallel to the maximum stretching direction (X) instead of parallel to Y and then rotating  
 531 towards X by progressive shearing (cf. Quinquis and Choukroune, 1981). Both models  
 532 assume a single deformation event with subhorizontal flow plane and ignore the polyphase  
 533 character of the "main foliation" and lineation, which is not a simple L-S fabric, but a  
 534 foliation that transposed and modified earlier structures. This places the significance of fold-  
 535 axes parallel stretching lineations and non-cylindrical folds in a quite different light. We  
 536 interpret that these formed by vertical flattening of folds with originally steeply dipping axial  
 537 planes and variably plunging fold-axes (Fig. 10). Depending on the precise geometry of  
 538 precursor folds, new folds nucleated with straight axes parallel to X, or with strongly curved  
 539 axes oblique to X.

## 540 6.3. Inclusion trail data vs. shear-bands

541 The reversed inclusion-trail curvature sense in lawsonite pseudomorphs with respect  
 542 to garnets in sample G11 records a change from top-south to top-north shear sense (see  
 543 section 4.2.) reminiscent of the change in regional-scale vergence interpreted by Phillipon et  
 544 al. (2009) from two sets of shear bands, as was already mentioned in section 2. They claimed  
 545 that rocks conserving well shaped lawsonite pseudomorph exclusively contain top-south shear  
 546 bands and that the lack thereof in other rocks also containing, or exclusively containing top-  
 547 to-the north criteria or is due to a higher degree of retrogression, which would have destroyed  
 548 the pseudomorphs. N-S sections of our lawsonite-bearing sample G11 cast doubts on these  
 549 claims by showing both asymmetries with the majority indicating top-to-the north (Fig. X3).  
 550 The sample comes from an area where according to Fig. 6 of Phillipon et al. (2009) only top-  
 551 to-the south criteria should be found.

552 In any event, shear-bands, pressure shadows and quartz c-axes fabrics are all related to  
 553 the latest intense deformation associated with a subhorizontal transposition foliation. It has  
 554 been shown that this foliation deformed a series of earlier steeply dipping foliations, and is  
 555 probably related to the exhumation history. This rather supports the original interpretation of

560 Quinquis (1980) and Shelley & Bossière (1999) who considered opposite shear bands as  
 561 conjugate pairs formed during the retrograde path.

562

#### 563 *6.4. Comparison with inclusion-trail data from NW-Iberia*

564

565 Figure 10 compares our new inclusion-trail data from Brittany with that of Aerden  
 566 (2004) for the Basal Unit of the allochthonous complexes of NW-Iberia. This unit comprises  
 567 orthogneisses and high-pressure micaschists retrogressed in greenschist facies representing  
 568 the subducted margin of Gondwana (Arenas et al, 1995; Martínez-Catalán, 1996) with a  
 569 similar structural position as the Pouldu Schists, below an ophiolitic unit. Three sets of  
 570 inclusion trails striking E-W, NE-SW and NNW-SSE were distinguished in this unit  
 571 preserved in plagioclase and garnet porphyroblasts. The oldest of these with E-W trend were  
 572 related to the high-pressure event dated 370-360Ma (Van Calsteren et al., 1979; Santos  
 573 Zalduegui, et al. 1995; Abati et al., 2010; Li & Massonne, 2017), and hence synchronous with  
 574 the metamorphism of Ile de Groix (Bosse et al., 2005). The 2 younger internal foliations sets  
 575 formed at lower pressures and their age was only loosely constrained to pre-320 Ma.

576 To account for the Cretaceous anticlockwise rotation of Iberia during formation of the  
 577 Gulf of Biscay, the current northern margin Iberian is placed back against the conjugate  
 578 margin of south Brittany in Fig. 10 implying 20° clockwise back-rotation of Iberia. Although  
 579 this reconstruction produces a good match of inclusion-trail strikes in both massifs (Fig. 10b),  
 580 it poses question around the relative timing evidence of Aerden (2004). He interpreted that the  
 581 (presently) NNW-SSE striking inclusion trails in the Basal Unit (coloured blue in Fig. 9)  
 582 postdate E-W striking ones (yellow), opposite to what has been concluded herein. As he  
 583 based this on only a sample with bimodal strikes of inclusion trails (sample 1. - Fig. 9a) we  
 584 believe there is scope for re-assessing the relative timing of Aerden (2004) using X-ray  
 585 tomography.

586 In contrast, the relative timing of NW-SE striking inclusion trails in NW Iberia  
 587 (marked with red lines in Fig. 9) was based on more abundant microstructural and field  
 588 criteria. Consequently, these microstructures cannot be correlated with the much older NW-  
 589 SE trails in samples of Ile de Groix. However, a correlation can be proposed with the internal  
 590 foliations of the 2 samples from the Central Armorican Domain, and the crenulation  
 591 cleavages that is present in the Pouldu schists (Fig. 2c and d).

592 We checked the curvature sense of inclusion trails in Aerden's (2004) thin sections  
 593 associated with the W-E to NW-SE FIAs (marked yellow in Fig. 10a) this author determined  
 594 in 6 samples of the Basal Unit. In samples 3-4, 10, 14 and 20, inclusion trails curve  
 595 anticlockwise viewing west. In samples 2 and 19 they curve clockwise. The larger number of  
 596 anticlockwise trails is as observed in Ile de Groix, but we realize that more samples need to be  
 597 studied before firm conclusions can be drawn regarding thrusting directions in NW Iberia.

598

## 599 **7. Conclusion**

600

601 (1) The blueschist-eclogite facies rocks of Ile de Groix experienced 4 successive  
 602 tectonic events potentially reflected in a also complex PT path (Schulz et al., 2001).  
 603 Corresponding fabrics are preserved as inclusion trails that maintained their original  
 604 orientations due to limited or no rotation of porphyroblasts during ductile deformation.

605 (2) In specific orientations and dominant curvature sense of inclusion trails allow the  
 606 following reconstruction. (Stage-I) Early NW-directed subduction of Gondwana. (Stage-2) E-  
 607 W crustal shortening with unconstrained subduction polarity, but probably to westward given  
 608 the preceding subduction direction. (Stage III) Northward subduction until peak metamorphic  
 609 conditions were reached. (Stage IV) Exhumation associated with vertical shortening and a  
 610 component of top-to-the-north shearing indicated by the asymmetry of inclusion trails in

611 lawsonite pseudomorphs as well as late shear bands (Philippon et al, 2009). A subhorizontal  
 612 crenulation cleavage associated with this event transposes all earlier fabrics. Inclusion-trails  
 613 studied in 4 additional greenschist samples from the lower-grade footwall of the Groix  
 614 ophiolite strike E-W, parallel to the youngest set of inclusion trails in the blueschist samples  
 615 from the island.

616 (3) The curvature sense of sigmoidal and spiral-shaped inclusion trails indicates top-  
 617 to-the south thrusting which agrees with regional-geological evidence only when a 'non-  
 618 rotational' original of these microstructures is accepted. The traditional 'rotational'  
 619 interpretation implied an opposite and shear sense conflicting with the regional tectono-  
 620 metamorphic structure of southern Brittany.

621 (4) The strikes of 3 sets of inclusion trails documented herein can be tentatively  
 622 correlated with 3 similar sets reported earlier in NW-Iberia (Aerden, 2004). The coincidence  
 623 of microstructural directions between both regions is maximized assuming only 20° rotation  
 624 of Iberia during opening of the Gulf of Biscay, significantly less as ca. 35° rotation generally  
 625 concluded from paleomagnetic data (Gong et al., 2009).

626 (5) Fold axes parallel to stretching lineations and rare sheath folds reported on Groix  
 627 did not form by progressive unidirectional shearing, but by vertical shortening and horizontal  
 628 shearing superposed on steeply dipping pre-existing foliations and folds with variable plunges.  
 629

### 630 **Acknowledgements**

631  
 632 The first author wishes to thank José Ramón Martínez Catalán for his support and  
 633 friendship ever since he started a postdoc in Salamanca in 1996. We thank Michel Ballèvre  
 634 for helping us to obtain permission from the Préfecture du Morbihan to collect samples on Ile  
 635 de Groix and for suggesting we sample the Pouldu schists as well. Ile de Groix national-park  
 636 guide Catherine Robert (and her dog) provided DA with helpful information and pleasant  
 637 company during field work. Bernhardt Schulz is thanked for clarifying various aspects about  
 638 the petrology of the studied rocks. This research was partially funded by a travel grant from  
 639 Junta de Andalucía to Aerden in 2006. This paper benefited greatly from the insightful  
 640 comments of 2 anonymous referees to whom we also express our gratitude.  
 641

### 642 **References**

- 643  
 644 Aerden, D.G.A.M. (1995) Porphyroblast non-rotation during crustal extension in the Variscan  
 645 Pyrenees. *Journal of Structural Geology* 17, 709-726.  
 646 Aerden, D.G.A.M. (1998) Tectonic evolution of the Montagne Noire and a possible orogenic  
 647 model for syn-collisional exhumation of deep rocks, Hercynian belt, France. *Tectonics* 17,  
 648 62-79.  
 649 Aerden, D.G.A.M. (2004) Correlating deformations in the Iberian Massif (Variscan belt)  
 650 using porphyroblasts; implications for the development of the Ibero-Armorican Arc.  
 651 *Journal of Structural Geology* 26, 177-196.  
 652 Aerden, D.G.A.M., Bell, T.H., Puga, E., Sayab, M., Lozano, J.A., Díaz de Federico, A.  
 653 (2013) Multi-stage mountain building vs. Relative plate motions in the Betic Cordillera  
 654 deduced from integrated microstructural and petrological analysis of porphyroblast  
 655 inclusion trails. *Tectonophysics* 587, 188-206.  
 656 Aerden, D.G.A.M., Ruiz-Fuentes, A. (2020) X-ray computed microtomography of spiral  
 657 garnets: A new test of how they form. *Journal of Structural Geology* 136.  
 658 <https://doi.org/10.1016/j.jsg.2020.104054>  
 659 Arenas, R., Rubio Pascual, F., Díaz García, F., Martínez Catalán, J.R. (1995) High-pressure  
 660 micro-inclusions and development of an inverted metamorphic gradient in the Santiago

- 661 Schists (Ordenes Complex, NW Iberian Massif, Spain): evidence of subduction and  
 662 syncollisional decompression. *Journal of Metamorphic Geology* 13, 141–164.
- 663 Arenas, R., Sanchez Martinez, S., Diez Fernandez, R., Gerdes, A., Abati, J., Fernandez-  
 664 Suarez, J., Andonaegui, P., Cuadra, P.G., Carmona, A.L., Albert, R., Fuenlabrada, J.M.,  
 665 Rubio Pascual, F.J. (2016) Allochthonous terranes involved in the Variscan suture of NW  
 666 Iberia: A review of their origin and tectonothermal evolution *Earth-Science Reviews* 161,  
 667 140-178.
- 668 Azor, A., Rubatto, D., Simancas, J.F., González Lodeiro, F., Martínez Poyatos, D.,  
 669 MartínParra, L.M., Matas, J., (2008) Rheic Ocean ophiolitic remnants in southern Iberia  
 670 questioned by SHRIMP U–Pb zircon ages on the Beja-Acebuches amphibolites. *Tectonics*  
 671 27, TC5006.
- 672 Ballevre, M; Pitra, P; Bohn, M., (2003) Lawsonite growth in the epidote blueschists from the  
 673 Ile de Groix (Armorican Massif, France): a potential geobarometer. *Journal of*  
 674 *Metamorphic Geology* 21, 723-735.
- 675 Ballèvre, M., Bosse V., Ducassou, C., Pitra. P., (2009) Palaeozoic history of the Armorican  
 676 Massif: Models for the tectonic evolution of the suture zones. *C. R. Geoscience* 341 (2009)  
 677 174–201.
- 678 Ballevre, M., Bosse, V., Dabard, M.P., Ducassou, C., Fourcade, S. et al., (2015) Histoire  
 679 Géologique du massif Armoricain : Actualité de la recherche. *Bulletin de la Société*  
 680 *Géologique et Minéralogique de Bretagne, Société géologique et minéralogique de*  
 681 *Bretagne*, (2013, (D), 10-11, pp.5-96. <insu-00873116>
- 682 Béchenec, F., Hallégouët, B., Thiéblemont, D., Thinon, I. (2012). Notice explicative, Carte  
 683 géol. France (1/50 000), feuille Lorient (383). Orléans : BRGM, 206 p.
- 684 Bell, T.H., (1985) Deformation partitioning and porphyroblast rotation in metamorphic rocks:  
 685 A radical reinterpretation. *Journal of Metamorphic Geology* 3, 109-118.
- 686 Bell, T. H., Rubenach, M. J. & Flemming, P. D., (1986) Porphyroblast nucleation, growth and  
 687 dissolution in regional metamorphic rocks as a function of deformation partitioning during  
 688 foliation development. *Journal of Metamorphic Geology*, 4, 37–67.
- 689 Bell, T.H, Sapkota, J., (2012) Episodic gravitational collapse and migration of the mountain  
 690 chain during orogenic roll-on in the Himalayas. *Journal of Metamorphic Geology* 30, 651-  
 691 666.
- 692 Bell, T. H., & Sanislav, I. V., (2011) A deformation partitioning approach to resolving the  
 693 sequence of fold events and the orientations in which they formed across multiply  
 694 deformed large-scale regions. *Journal of Structural Geology*, 33(7), 1206–1217.  
 695 <https://doi.org/10.1016/j.jsg.2011.03.014>
- 696 Bell, T.H., Forde, A., Wang, J., (1995) A new indicator of movement direction during  
 697 orogenesis - measurement technique and application to the Alps. *Terra Nova* 7, 500-508.
- 698 Bell, T.H., Hickey, K.A., Upton, G.J.G., (1998) Distinguishing and correlating multiple  
 699 phases of metamorphism across a multiply deformed region using the axes of spiral,  
 700 staircase, and sigmoidally curved inclusion trails in garnet. *Journal of Metamorphic*  
 701 *Geology* 16, 767-794.
- 702 Bell, T.H., Johnson, S.E., Davis, B., Forde, A., Hayward, N., Wilkins, C., (1992)  
 703 Porphyroblast inclusion-trail orientation data: eppure non son girate! *Journal of*  
 704 *Metamorphic Geology* 10, 295-307.
- 705 Bosse V., Ballèvre M., Vidal O., (2002) Ductile thrusting recorded by the garnet isograd from  
 706 blueschist-facies metapelites of the Île de Groix, Armorican Massif, France. *Journal of*  
 707 *Petrology* 43, 485-510.
- 708 Bosse, V., Féraud, G., Ballèvre, M., Peucat, J.J., Corsini, M., (2005) Rb–Sr and <sup>40</sup>Ar/<sup>39</sup>Ar  
 709 ages in blueschists from the Ile de Groix (Armorican Massif, France): Implications for  
 710 closure mechanisms in isotopic systems. *Chemical Geology* 220 (2005) 21– 45.
- 711 Bucher, H., 1956. Role of gravity in orogenesis. *Bull. Geol. Soc. Am.* 67, 1295-1318.



- 712 Cannat, M., (1985) Quartz microstructures and fabrics in the island of Groix (Brittany,  
713 France). *Journal of Structural Geology* 7, 555–562.
- 714 Ceriani, S., Mancktelow, N. S., Pennacchioni, G., 2003. Analogue modelling of the influence  
715 of shape and particle/matrix interface lubrication on the rotational behaviour of rigid  
716 particles in simple shear. *Journal of Structural Geology* 25, DOI: 10.1016/S0191-  
717 8141(03)00098-1.
- 718 Cobbold, P.R., Quinquis, H., (1980) Development of sheath folds in shear regimes. *Journal of*  
719 *Structural Geology* 2, 119-126.
- 720 Cogné J., Daniel, J., Ruhland, M., (1966) L'île de Groix. Etude structurale d'une série  
721 métamorphique à glaucophane en Bretagne méridionale. In: *Bulletin du Service de la carte*  
722 *géologique d'Alsace et de Lorraine*, 19-1, pp. 41-96. doi :  
723 <https://doi.org/10.3406/sgeol.1966.1298>
- 724 Díaz García, F., Arenas, R., Martínez Catalán, J.R., González del Tánago, J., and Dunning,  
725 G.R., (1999) Tectonic evolution of the Careón ophiolite (northwest Spain): A remnant of  
726 the oceanic lithosphere in the Variscan Belt. *Journal of Geology*, v. 107, p. 587–605.
- 727 Doube M, Kłosowski MM, Arganda-Carreras I, Cordelières F, Dougherty RP, Jackson J,  
728 Schmid B, Hutchinson JR, Shefelbine SJ. (2010) BoneJ: free and extensible bone image  
729 analysis in ImageJ. *Bone* 47:1076-9. doi: 10.1016/j.bone.2010.08.023
- 730 Faure, M., Bé Mézème, E., Cocherie, A., Rossi, P., Chemenda, A., Boutelier, D., (2008)  
731 Devonian geodynamic evolution of the Variscan Belt, insights from the French Massif  
732 Central and Massif Armoricain, *Tectonics*, 27, TC2005, doi:10.1029/2007TC002115.
- 733 Felix, C., Fransolet, A.M., (1972) Pseudomorphes à épidote s.l., paragonite, muscovite s.l.,  
734 chlorite, albite. de porphyroblastes de lawsonite (?) dans les glaucophanites de l'île de  
735 groix (bretagne – France). *Annales de la Société Géologique de Belgique* 95, 323–334.
- 736 Gong, Z., Langereis, C.G., Mullender, T.A.T. , (2008) The rotation of Iberia during the  
737 Aptian and the opening of the Bay of Biscay. *Earth and Planetary Science Letters* 273, 80–  
738 93.
- 739 Hayward, N., (1990) Determination of early fold axis orientations in multiply deformed rocks  
740 using porphyroblast inclusion trails. *Tectonophysics* 179, 353-369.
- 741 Hayward, N., (1992) Microstructural analysis of the classical spiral garnet porphyroblasts of  
742 south-east Vermont: evidence for non-rotation. *Journal of Metamorphic Geology* 10, 567-  
743 587.
- 744 Huddleston-Holmes, C.R., Ketcham, R.A., (2005) Getting the inside story: using computed  
745 X-ray tomography to study inclusion trails in garnet porphyroblasts. *American*  
746 *Mineralogist* 90. DOI: 10.2138/am.2005.1840.
- 747 Huddleston-Holmes, C.R., Ketcham, R.A., (2010) An X-ray computed tomography study of  
748 inclusion trail orientations in multiple porphyroblasts from a single sample.  
749 *Tectonophysics* 480, 305–320.
- 750 Kim, H.S., Sanislav, I.V. (2017). Foliation intersection/inflection axes within porphyroblasts  
751 (FIAs): a review of advanced applications and significance. *Geosciences Journal* 21,  
752 1013-1032. <http://dx.doi.org/10.1007/s12303-017-0047-z>
- 753 Lagarde, J.L. (1980). La déformation des roches dans les domaines à schistosité  
754 subhorizontale. Applications à la nappe du Canigou-Roc de France (Pyrénées orientales) et  
755 au complexe crystallophyllien de Champtoceaux (Massif armoricain). Unpublished PhD  
756 thesis, Université de Rennes, 170 p.
- 757 Li, B., Massonne, H.J., (2017) Contrasting metamorphic evolution of metapelites from the  
758 Malpica-Tuy unit and the underlying so-called parautochthon at the coast of NW Spain.  
759 *Lithos* 286–287, 92–108. <http://dx.doi.org/10.1016/j.lithos.2017.06.003>
- 760 Mares, V.M., (1998) Structural development of the Soldiers Cap Group in the Eastern Fold  
761 Belt of the Mt Isa Inlier: a successive of horizontal and vertical deformation events and  
762 large-scale shearing. *Aust. J. Earth Sci.* 45, 373–387.

- 763 Martínez Catalaín, J.R., Arenas, R., Díaz García, F., Rubio Pascual, F.J., Abati, J., Marquínez,  
764 J., (1996) Variscan exhumation of a subducted Palaeozoic continental margin: the basal  
765 units of the Ordenes Complex, Galicia, NW Spain. *Tectonics* 15, 106–121.
- 766 Martínez Catalán J.R., Arenas, R., Díaz García, F., Abati, J. 1997. Variscan accretionary  
767 complex of northwest Iberia: Terrane correlation and succession of tectonothermal events.  
768 *Geology* 25, p. 1103–1106.
- 769 Martínez-Catalan, J.R., Diaz-García, F., Arenas, R., Abati, J., Castineiras, P., Gonzalez-  
770 Cuadra, P., Gómez-Barreiro, J., Rubio-Pascual, F.J., (2000) Thrust and detachment  
771 systems in the Ordenes Complex (northwestern Spain): Implications for the Variscan-  
772 Appalachian geodynamics. 15th International Conference on Basement Tectonics  
773 Location: La Coruna, Spain Date: July 04-08, 2000. Variscan-Appalachian dynamics: the  
774 building of the late Paleozoic basement. *Geological Society of America Special Papers*  
775 364, 163-182.
- 776 Martínez-Catalán, J.R., (2012) The Central Iberian arc, an orocline centered in the Iberian  
777 Massif and some implications for the Variscan belt. *Int J Earth Sci (Geol Rundsch)*  
778 101:1299–1314. DOI 10.1007/s00531-011-0715-6
- 779 Matte, P., (2001) The Variscan collage and orogeny (480-290 Ma) and the tectonic definition  
780 of the Armorica microplate: a review. *Terra Nova* 13, 122-128.
- 781 Merle, O., The building of the central Swiss Alps: An experimental approach. *Tectonophysics*,  
782 165, 41-56, 1989.
- 783 Munro, M. A., & Blenkinsop, T. G. (2012). MARD - A moving average rose diagram  
784 application for the geosciences. *Computers & Geosciences*, 49, 112–120.  
785 <https://doi.org/10.1016/j.cageo.2012.07.012>
- 786 Philippon M., Brun J.-P. et Gueydan F., (2009) Kinematic records of subduction and  
787 exhumation in the Île de Groix blueschists (Hercynian belt ; Western France). *Journal of*  
788 *Structural Geology* 31, 1308-1321.
- 789 Quinquis, H., Audren, C., Brun, J. P. & Cobbold, P. R. (1978) Intense shear in Ile de Groix  
790 blueschists and compatibility with subduction or obduction. *Nature, Lond.* 273, 43-45.
- 791 Quinquis, H., (1980) Schistes bleus et déformation progressive: l'exemple de l'Île de Groix  
792 (Massif Armoricain). Université de Rennes 1.
- 793 Quinquis, H., Choukroune, P., (1981) The Ile de Groix blueschists in the Hercynian chain -  
794 kinematical implications. *Bulletin de la société géologique de France* 2, 409-418.
- 795 Rosenfeld, J.L., (1970) Rotated garnets in metamorphic rocks. *Geological Society of America*  
796 *Special Paper* 129, 102pp.
- 797 Sayab, M., (2005) Microstructural evidence for N–S shortening in the Mount Isa Inlier (NW  
798 Queensland, Australia): the preservation of early W–E-trending foliations in  
799 porphyroblasts revealed by independent 3D measurement techniques. *Journal of Structural*  
800 *Geology* 27, 1445-1468.
- 801 Shah, S.Z. Sayab, M., Aerden, D.G.A.M, Asif-Kahn, M. (2011) Foliation intersection axes  
802 preserved in garnet porphyroblasts from the Swat area, NW Himalaya: A record of  
803 successive crustal shortening directions between the Indian plate and Kohistan-Ladakh  
804 Island Arc. *Tectonophysics* 509, 14-32.
- 805 Shelley, D., Bossière, G., (1999) Ile de groix: retrogression and structural developments in  
806 an extensional régime. *Journal of Structural Geology* 21, 1441–1455.
- 807 Schindelin, J., Arganda-Carreras, I., Frise, E., Kaynig, V., Longair, M., Pietzsch, T., Preibisch,  
808 S., Rueden, C., Saalfeld, S., Schmid, B., Tinevez, J.Y., White, D.J., Hartenstein, V.,  
809 Eliceiri, K., Tomancak, P., Cardona, A., (2012) Fiji: an open-source platform for  
810 biological-image analysis. *Nature Methods* 9, 676-682.
- 811 Schulz, B., Triboulet., C., Audren., C; Pfeifer., H.R., Gilg, A., (2001) Two-stage prograde and  
812 retrograde Variscan metamorphism of glaucophane-eclogites, blueschists and greenschists  
813 from Ile de Groix (Brittany, France) *International Journal of Earth Sciences*, 90, 871-889.



- 814 Spry, A., 1633) The origin and significance of snowball structure in garnet. *Journal of*  
 815 *Petrology* 4, 211-222.
- 816 Stallard, A.R., Hickey, K.A., Upton, G.J., (2003) Measurement and correlation of  
 817 microstructures: the case of foliation intersection axes. *Journal of Metamorphic Geology*  
 818 21, 241–252.
- 819 Triboulet, C., (1974) Les glaucophanites et roches associées de l'île de Groix (Morbihan,  
 820 France): étude minéralogique et pétrogénétique. *Contributions to Mineralogy and*  
 821 *Petrology*, 45, 65–90.
- 822 Zwart, H., (1962) On the determination of polymorphic mineral associations and its  
 823 application to the Bosost area (central Pyrenees). *Geologisches Rundschau*, 52, 38-65.

#### FIGURE CAPTION

824  
 825  
 826  
 827  
 828 Fig. 1. Simplified geological maps of southern Brittany and NW-Iberia showing the location  
 829 of ophiolite outcrops and samples studied herein and by Aerden (2004) in NW Iberia.

830  
 831 Fig. 2. (a) Stretching lineation pattern of Ile de Groix and sample locations. (b) Moving-  
 832 average rose diagrams for inclusion-trail strikes. Encircled pie-cake symbols represent  
 833 average FIA trends in samples determined from radial thin sections and the FIA plunge  
 834 direction. Also the sense of inclusion-trail curvature is indicated viewing down the FIA  
 835 plunge (anticlockwise in G14, G12, G11; clockwise in G19 and G7). (c) Data for samples  
 836 from the Pouldu schistes (PO2, 3, 5) and the Tréogat formation (AU1). Arrows represent  
 837 crenulation axes in the matrix. (d) Data for 2 staurolite-kyanite schists from the Central  
 838 Armorican Domain. The 4 inclusion-trail sets proposed in this paper are marked with magenta,  
 839 blue, yellow and red trend lines, from the oldest to the youngest set.

840  
 841 Fig. 3. (a) Rotational interpretation of sigmoidal and spiral-shaped inclusion trails from Ile de  
 842 Groix and the range (purple) of inclusion trail strikes predicted by this model. (b) 'Non-  
 843 rotational' interpretation of the same inclusion trails according to Bell et al (1986) and Bell &  
 844 Johnson (1989) consistent with orthogonal truncations and inclusion trails striking subparallel  
 845 to stretching lineations, crenulation- and fold-axes. (c) Strikes measured in all 10 samples  
 846 from Groix agree better with the non-rotational model.

847  
 848 Fig. 4. (a) Sketches of well developed 'rotational' inclusion trails in oriented vertical thin  
 849 sections of samples G7 and G14 showing vertical and horizontal alignment of internal  
 850 truncations (purple lines). (b) Rose diagram plotting the orientations of all individual dashes  
 851 that make up the dashed lines representing inclusion trails in the drawings measured with the  
 852 image/analysis program *Fiji*. The plot demonstrates bimodal orientations of the inclusion  
 853 trails related to the orthogonal sets of truncations.

854  
 855 Fig. 5. All photographs of G11. (a and b) Garnet porphyroblast (parallel and crossed polars)  
 856 with sigmoidal trails in a N-S striking vertical section. Barb of N-arrow points upward. Note  
 857 top-to-the south shear sense suggested by asymmetric strain shadows, inconsistent with  
 858 porphyroblast rotation. (c) Garnet with spiral-shaped truncation inclusion trails a  
 859 porphyroblast core and rim zone. (d) Opaque mineral with elongate shape replaced by  
 860 Goethite. (e and f). Lawsonite pseudomorphs (parallel and crossed polars) showing weakly  
 861 sigmoidal inclusion trails oblique to the matrix foliation. (g) Tomographic image of a strongly  
 862 curved inclusion trails garnet in G12. (h) Tomographic image of an elongate lawsonite  
 863 pseudomorph, garnet (Gt) and opaque large opaque crystal.

864

865 Fig. 6. Stereoplots (equal angle, lower hemisphere) of internal foliations and FIAs measured  
 866 in garnet and lawsonite pseudomorphs in samples G11 and G12. Also shown are 2 contoured  
 867 stereoplots plotting maximum and minimum elongation directions of relatively large opaques  
 868 present in the matrix of G11 and G12. See legend. The data can be matched to different sets  
 869 of inclusion trails drawn with corresponding colors in garnets and a representative lawsonite  
 870 pseudomorphs. The Mn concentration map is for one of the porphyroblasts with truncational  
 871 inclusion trails.

872  
 873 Fig. 7. Tomographic images and microstructural data for sample G14. (a) Stereoplot of  
 874 internal foliation planes, FIAs (grey boxes), long- and short axes of opaque minerals, and the  
 875 axial plane of cm-scale folds. (b and c) Map- and cross-section views of a fold outlined by an  
 876 epidote-rich layer. Its axial trace trends NNE-SSW oblique to N-S trending cross-cutting  
 877 cleavage zones also visible in (d). The cross-section shows refolding with subhorizontal axial  
 878 planes suggesting a component of vertical flattening associated with the main cleavage  
 879 (compare with Fig. 4a, b).

880  
 881 Fig. 8. (a) 3D microstructural data for sample G3. See legend for explanation. (b) Field data  
 882 collected by Claude Audren near sample G7 (Plage du Trech; about 1 km north of G3) and  
 883 the average FIA trend that we determined for this sample from radial thin sections (magenta  
 884 pie-cake segment). The FIA trend coincides with fold axes. Note that this conflicts with  
 885 progressive sheath folding and porphyroblast rotation. Stretching lineations vary greatly due  
 886 reflecting the polyphase nature of this fabric. (c) Microstructural data for G20. See legend and  
 887 main text for explanation. The 6 garnet long axes with red fill in the right stereoplot  
 888 correspond to the 6 garnet whose FIA were measured as indicated in the left stereoplot. These  
 889 garnet long-axes consistently make lie at a high angle to their FIAs (the moderately NNE  
 890 plunging long-axes with red fill belongs to the subhorizontal NW-SE FIA).

891  
 892 Fig. 9. (a) Structural data collected by C. Audren and a corresponding sketch of isoclinal folds  
 893 he drew at Vallon de Kérigant (location marked in Fig. 2a). The sketch is accurately redrafted  
 894 and data re-plotted in lower hemisphere, equal angle projection (Audren used upper  
 895 hemisphere, equal angle). Refolding of a N165 trending lineation around the nose of a N120  
 896 trending fold is demonstrated. (b) Lineations (L1) measured nearby (a) by Boudier & Nicolas  
 897 (1976) at Vallon du Lavoisier showing a N120 trend maximum of L1 (yellow lines) oblique to  
 898 B2 fold axes in the same outcrop (blue lines). (c) Structural data from the same authors for the  
 899 entire island. Note the bimodal pattern of L1. Magenta, blue and yellow trend lines show how  
 900 this data can be correlated with the 3 sets of inclusion trails given the same colors in Figs 2, 5,  
 901 7 and 8.

902  
 903 Fig. 10. (a) Inclusion trails-strikes in the newly studied rocks and those measured by Aerden  
 904 (2004) in 18 samples from the Basal Unit of NW-Iberia. The microstructures are correlated as  
 905 4 age sets marked with magenta, blue, yellow and red trend bars (from older to younger sets).  
 906 Field data from Boudier and Nicolas (1976) and that of Engels (1972) and van Zuuren (1969)  
 907 also show a good match. (b) Rose diagrams plotting inclusion-trail directions marked blue  
 908 and yellow for different amounts of Iberia back-rotation. The directions line up best with 20°  
 909 back-rotation, which is the current angle between the North-Iberia margin and that of southern  
 910 Brittany.

911  
 912 Fig. 11. Conceptual models showing how vertical shortening and horizontal stretching can  
 913 produce highly variable fold geometries depending on the original orientations of folded  
 914 planes or pre-existing folds. Note how strongly curved fold axes can form without need of

915 extremely large shears trains. Adding a (horizontal) shearing component in the direction of X  
916 and/or Y can be expected to further modify the fold-interference patterns.tt

917

918

919 Interestingly, Béchenec et al. (2012) report that some albite porphyroblasts in the Pouldu  
920 schists include tiny garnets. In principle, these could be coeval with garnet growth in Ile de  
921 Groix.

922

923 All stereoplots are made with R. Allmendinger's program 'Stereonet'.

924

925 a Carboniferous age of the inclusion trails, corresponding to the continental collision stage of  
926 the Variscan orogeny when also the major dextral shear-zone system developed that dissects  
927 Armorican Massif (Béchenec et al. (2012).

928 The blueschist and eclogite metamorphism of Ile de Groix peaked in the late-Devonian in the  
929 context of oceanic subduction.

930

931

932 CITRE SAYAB ET AL 2021
