# Supplementary material for: Kinematics of subduction in the Ibero-Armorican arc constrained by 3D microstructural analysis of garnet and pseudomorphed lawsonite porphyroblasts from Ile de Groix (Variscan belt)
Source: Copernicus journal article supplement (doi:10.5194/se-2020-175), 2020-10-19
Supplement: Supplementary file [file se-2020-175-RC2-supplement.pdf]

1 **Kinematics of subduction in the Ibero-Armorican arc constrained by 3D**  
2 **microstructural analysis of garnet and pseudomorphed lawsonite porphyroblasts**  
3 **from Ile de Groix (Variscan belt)**

4  
5 **(Special issue: "The Iberian Massif in the frame of the European Variscan Belt")**

6  
7 Domingo G.A.M. Aerden<sup>a,b</sup>

8 Mohammad Sayab<sup>d</sup>

9 Aidan Forde<sup>c</sup>

10 Alejandro Ruiz-Fuentes<sup>a</sup>

11  
12 <sup>a</sup>Departamento de Geodinámica, Universidad de Granada, Spain

13 <sup>b</sup>Instituto Andaluz de Ciencias de la Tierra, CSIC/Universidad de Granada, Spain

14 <sup>c</sup>Saorgus Energy Ltd, Kerry, Ireland

15 <sup>d</sup>Geological Survey of Finland, Espoo, Finland

16  
17 **Abstract**

18  
19 The small island of Groix in southern Brittany, France, is well known for its excellent  
20 outcrops of Variscan blueschists, eclogites and garnetiferous micaschists that define a Late-  
21 Devonian suture between Gondwana and Armorica. The kinematics of polyphase deformation  
22 in these rocks is reconstructed based on 3D microstructural analysis of inclusion trails in  
23 garnet- and pseudomorphed lawsonite porphyroblasts using multiple, differently oriented thin  
24 sections of single samples and X-ray tomography. Three sets of inclusion trails striking NE-  
25 SW, NNW-SSE and WNW-ESE are interpreted to witness a succession of different crustal  
26 shortening directions orthogonal to these trends. The curvature sense of sigmoidal- and spiral-  
27 shaped inclusion trails of the youngest set is shown to be consistent with southward thrusting  
28 or northward subduction of Gondwana under Armorica, provided that these microstructures  
29 developed by overgrowth of actively forming crenulations instead of the previously envisaged  
30 'snowball' mechanism. The latter predicts an opposite thrusting direction which is at odds with  
31 the regional tectono-metamorphic zonation in the Ibero-Armorican Arc. Strongly non-

32 cylindrical folds locally found on Ile de Groix are reinterpreted as fold-interference structures  
33 instead of having formed by progressive shearing. Six additional samples of lower-grade  
34 footwall units of the Groix ophiolite were also studied. The oldest inclusion trails in these  
35 rocks have similar trends as the youngest one in Ile de Groix. Our new inclusion-trail data for  
36 southern Brittany bear a strong resemblance with those documented previously in the north-  
37 western Iberian Massif and suggest about 20° clockwise rotation of Iberia during the early  
38 Cretaceous opening of the Gulf of Biscay.

39

40 Key words: porphyroblast inclusion trails, FIA, Variscan subduction, Ibero-Armorican arc, Ile  
41 de Groix.

42

### 43 **1. Introduction**

44

45 Kinematic reconstructions in polydeformed metamorphic regions are traditionally  
46 based on a combination of geological mapping, study of structural relationships in outcrop,  
47 orientation measurements, and study of thin sections usually cut parallel to the stretching  
48 lineation to determine a shear sense. Not rarely does this approach produce paradoxical data  
49 that insufficiently constrain different possible tectonic models as is certainly the case of Ile de  
50 Groix as we will see. However, following a major conceptual shift concerning the formation  
51 mechanism and tectonic significance of porphyroblast inclusion trails (Bell et al., 1985, 1986;  
52 Bell & Johnson, 1989), 3D microstructural data for such microstructures has been shown to  
53 allow detailed reconstruction of deformation histories whose complexity was previously not  
54 recognized. Aerden (2004) pioneered this approach in Variscan NW Iberia in a research  
55 project led by José Ramón Martínez Catalán. He distinguished 4 inclusion-trail sets with  
56 specific, regionally consistent trends and relative timing. An E-W trend of the earliest formed  
57 set was interpreted to record N-S directed compression and subduction with unknown polarity.  
58 Subduction would have been followed by several changes in the direction of crustal  
59 shortening responsible for the 3 younger sets of inclusion trails. The youngest two sets with  
60 NE-SW and WNW-ESE trends were correlated with regional-scale fold-interference patterns  
61 developed throughout the Iberian Massif and this, in turn, was key to rediscovering a partially  
62 blind arc in central Iberia later endorsed by Martínez Catalán et al. (2012).

63 Here, we report a similar study of inclusion trails in the Armorican Massif focusing on  
64 high-pressure metabasites of Ile de Groix, but also including data from lower-grade rocks  
65 located in their footwall. The island of Groix (ca. 15 km<sup>2</sup>) is a national reserve with excellent

66 coastal outcrops of Variscan blueschists, eclogites and interlayered garnetiferous micaschists  
67 that are generally accepted to represent the remains of a narrow ocean that, in the late Silurian  
68 and lower Devonian separated Gondwana in the south from the Armorica microplate to the  
69 north. In NW-Iberia, a similar ophiolitic unit is since long recognized and correlated with the  
70 one exposed on Groix island (Arenas et al., 1995; Diaz-García et al., 1999; Ballèvre et al.,  
71 2009, 2015). Closure of this ocean involved subduction of the margin of Gondwana causing  
72 high-pressure metamorphism dated 370-360Ma on Ile de Groix (Bosse et al., 2005). However,  
73 the polarity and kinematics of ophiolite emplacement have remained poorly constrained by  
74 (micro)structural data. Indeed, not much has changed since Quinquis et al. (1978) wrote: "*the*  
75 *bulk sense of shear on Groix has not yet been determined unequivocally, but may perhaps be*  
76 *deduced from systematic analyses of fold asymmetry and of microstructures in and around*  
77 *syntectonic garnets. The significance of glaucophane orientation in the basic rocks of Groix*  
78 *also needs to be studied: the orientation is extremely variable and may not be simply related*  
79 *to a shear direction.*" Exactly along these lines of suggested further research, we performed a  
80 detailed microstructural analysis of 10 garnetiferous blueschist samples of Ile de Groix, 4  
81 samples of albite-porphyroblast bearing greenschists (Pouldu schists) cropping out along the  
82 coast of the mainland, and 2 kyanite-staurolite schists collected inland from the North-  
83 Armorican Zone (Fig. 1). It will be shown that behind the simple appearance of the regional  
84 stretching lineation pattern on Ile de Groix, a complex tectonic evolution is hidden recorded  
85 by inclusion trails in garnets and pseudomorphed lawsonite crystals. Our microstructural data  
86 resolve conflicting kinematic interpretations of previous workers regarding and proposes a  
87 new polyphase model for sheath folds locally found on the island.

88

## 89 **2. Geological setting and previous work**

90

91 The Variscan (or Hercynian) orogeny took place in the Devonian and Carboniferous  
92 as a consequence of Gondwana-Laurussia convergence with 2 microcontinents in between  
93 these 2 giants known as Armorica and Avalonia. The resulting closure of oceanic domains  
94 created multiple ophiolitic sutures whose precise location, timing and correlation continues to  
95 be a major research topic (e.g. Azor et al., 2008; Faure, 2008; Ballèvre et al., 2009; Arenas et  
96 al., 2016). The high-pressure rocks of Ile de Groix are part of a partially submerged ophiolitic  
97 klippen belonging to a thrust nappe that separates Armorican crustal units in the hangingwall  
98 outcropping to the North- and Central Armorican Domains, from North-Gondwana derived  
99 crustal units below the suture outcropping in the South Armorican Domain and NW Iberia

100 (Fig. 1). Because of this regional-scale zonation, a north-dipping subduction zone associated  
101 with south verging thrusts has been considered the most likely geodynamic scenario (Matte,  
102 2001; Faure et al., 2008; Ballèvre et al., 2009; Ballèvre 2015). However, structural data have  
103 not allowed to independently confirm this model and in fact have yielded conflicting results.

104 Lagarde (1980) concluded NW directed thrusting from shear criteria in the  
105 Champtoceaux Complex (Fig. 1), implying south-east subduction. A similar kinematic was  
106 deduced on Ile de Groix by Quinquis (1980), Quinquis & Choukroune (1981) and Cannat  
107 (1985) from rotated snowball garnets and quartz c-axes fabrics. Recognizing the conflict with  
108 respect to northward subduction, these authors proposed that this shear sense corresponds to  
109 backthrusting and obduction of ophiolites in opposite direction as subduction.

110 However, Quinquis (1980) noticed that shear bands (C and C' planes) on Ile de Groix  
111 indicate opposite shear senses, which was later interpreted by Shelley and Bossière (1999) in  
112 terms of bulk vertical shortening and crustal thinning. These authors emphasized that shear  
113 bands showing opposite displacements cannot be linked to different metamorphic conditions  
114 and probably formed as conjugate sets. They also found equal amounts of oppositely shear  
115 senses indicated by quartz fabrics which they measured in 57 oriented samples. Philippon et  
116 al. (2009) argued on the contrary that opposite shear-band sets did form consecutively under  
117 different metamorphic conditions. A first set would have developed during prograde  
118 metamorphism with top-to-the SW (N140) shearing, and the second during quasi-opposite  
119 top-to-the-north (N350) shearing and retrogression. However, they failed to address a top-to-  
120 the-north shear sense during prograde metamorphism deduced from rotated garnets by  
121 Quinquis & Choukroune (1981).

122

### 123 **3. Microstructural methods**

124

125 A total of 132 oriented thin sections were studied of 33 samples: 20 from Ile de Groix,  
126 9 from the Pouldu schists and equivalent rocks cropping out in the Baye d'Audièrne, and 4  
127 from the Central Armorican Zone (Fig. 1). Initially, a horizontal thin section was cut of each  
128 sample to assess the interest of the rock for further study and to measure the strike of  
129 inclusion trails. The latter only proved possible in about half of the samples as the other half  
130 contained garnets that were too altered or contained poorly developed or absent inclusion  
131 trails. Strike measurements for inclusion trails are plotted in moving-average rose diagrams  
132 made with the Excel Workbook MARD (Munro & Blenkinsop, 2012).

133 Seven Ile de Groix samples containing the most promising inclusion trails were further  
 134 studied in 6 vertical thin sections striking N0, N30, N60, N90, N120 and N150. Such radial  
 135 thin-section sets allow determination of the average trend of inclusion-trail curvature axes  
 136 (Hayward, 1990) known as 'FIA' in the more recent literature ('Foliation Intersection- or  
 137 Inflexion-Axes'; Bell et al., 1992; Bell et al., 1995; Stallard et al., 2003; Kim & Sanislav,  
 138 2017). Application of this technique has in numerous mountain belts revealed regionally  
 139 consistent orientations of FIA (Kim and Sanislav, 2017 and references cited therein) thought  
 140 to record crustal shortening directions orthogonal to FIA trends and changes therein where  
 141 multiple sets of FIA can be distinguished.

142 Four of our Ile-de-Groix samples (G3, G11, G12 and G14) were studied in even  
 143 greater detail using X-ray computed tomography allowing study of virtual sections of any  
 144 orientation and location in a scanned volume, as well as quantitative analysis of mineral-grain  
 145 shapes.

146

#### 147 4. Strike and pitch measurements of inclusion-trails

148

149 The samples studied in detail from Ile de Groix come from 3 areas in the north (G18-  
 150 20), east (G3, G7) and south-east (G11-15) of the island (Fig. 2a). The matrices of these rocks  
 151 contain a mineral/stretching lineation that exhibits significant variation but overall trends N-S  
 152 in the south-east of the island changing gradually towards NW-SE towards the north and west.  
 153 Bosse et al. (2002) inferred a thrust contact separating garnetiferous eclogites, blueschists and  
 154 micaschists exposed in the eastern half of the island from underlying lower-grade (albite-  
 155 epidote facies) rocks outcropping in the western half (Triboulet, 1974; Schulz, 2001).

156 Since stretching lineations on Groix are associated with a foliation that generally dips  
 157 gently or subhorizontal, shearing-induced rotation of porphyroblasts can be expected to have  
 158 resulted in inclusion trails that broadly strike orthogonal to the lineation (Fig. 3a). Our  
 159 measurements, however, show exactly the opposite, a NNE-SSW strike maximum of  
 160 inclusion trails subparallel to the stretching lineation. This is only a first indication that the  
 161 classic interpretation of internal foliations based on Zwart (1960), Spry (1963) or Roosenfeld  
 162 (1970) may be incorrect and that the alternative model proposed by Bell (1985) and Bell et al.  
 163 (1986) has to be considered. The latter claims that sigmoidal and spiral-shaped inclusion trails  
 164 form by punctuated overgrowth of one or multiple crenulation cleavages by porphyroblasts  
 165 that rotate little or not during deformation due to the micro-partitioning of deformation  
 166 between cleavage planes and microlithons (Fig. 3b). FIAs represent 'fossil' crenulation axes in

167 this model and this explains why FIA are commonly parallel to crenulation- and fold-axes in  
 168 the matrix (Aerden, 1995, 2004, 1998, Sayab, 2005, Aerden et al., 2013; Bell & Sanislav,  
 169 2011).

170 Further evidence supporting a 'non-rotational' origin of sigmoidal and spiral-shaped in  
 171 Ile de Groix is provided by garnets in samples G7, G11 and G14. These exhibit the same  
 172 characteristic truncation surfaces that Bell & Johnson (1989) drew attention to. They showed  
 173 that these truncations in spiral garnets from different orogens systematically align along  
 174 vertical and horizontal axes, something that has been amply confirmed by later research (e.g.  
 175 Bell et al., 1992; Hayward, 1992; Aerden, 1994, 1998, 2004; Mares, 1998; Bell & Sapkota,  
 176 2012; Sayab, 2005; Shah et al., 2009; Aerden and Ruiz Fuentes, 2020). Oriented line  
 177 drawings of spiral garnets in G7, G14 and G11 also show orthogonal preferred orientations of  
 178 their truncations (Fig. 4) in agreement with their origin by stepwise overgrowth of successive  
 179 subvertical and subhorizontal crenulation cleavages.

180

## 181 5. Curvature sense of inclusion trails

182

183 The above mentioned rotational and non-rotational models deduce an opposite shear  
 184 sense from a given inclusion trail curvature sense. Quinquis & Choukroune (1981) reported  
 185 that out of a total of 29 thin sections they studied cut parallel to the stretching lineation, 26  
 186 contained sigmoidal or spiral-shaped inclusion trails indicating top-to-the north shearing. As  
 187 they assumed the traditional 'rotational' model, it follows that their inclusion trails  
 188 predominantly curve anticlockwise when viewed in westward direction. In effect, we found  
 189 the same predominance in our samples after counting the number of clockwise vs.  
 190 anticlockwise trails in all vertical thin sections striking N-0, N30, N120 and N150. That is all  
 191 thin sections making a small angles with the regional stretching lineation. This resulted in 99  
 192 anticlockwise and 27 clockwise inclusion trails (viewing westward), a ratio of about 4:1.

193 According to the 'non-rotational' model, the observed asymmetry, in principle, implies  
 194 crustal shortening with a component of north-side-up shearing on vertical foliations  
 195 alternating with gravitational collapse with a component of top-to-the south shearing on  
 196 horizontal foliations (Bell & Johnson, 1989, their Figs. 16 and 17). Note that this is consistent  
 197 with the northward subduction interpreted by most authors from the regional  
 198 tectonometamorphic zonation in the Ibero-Armorican Arc. Quinquis & Choukroune (1981),  
 199 however, deduced an opposite thrusting direction from the same inclusion trails and attempted

200 to reconcile this with a northward subduction by invoking backthrusting and ophiolite  
201 obduction, for which there is little independent evidence.

202 Strain shadows around porphyroblasts composed of quartz, feldspar and chlorite do  
203 not show consistent asymmetries. In fact, they are commonly rather symmetrical or showing  
204 opposite asymmetries even on both sides of the same porphyroblast. Where a clear  
205 asymmetry is observed it is consistent with the shear sense indicated by inclusion trail  
206 curvature according to the non-rotational model only (Figs. 5a, b).

207 So, we could have finished our paper here with the conclusion that no reconciliation is  
208 needed, if not a more detailed 3D study of porphyroblasts had revealed a far more complex  
209 tectonic history including different tectonic transport directions associated with multiple  
210 inclusion-trail sets and FIA.

211

## 212 **6. Average FIAs**

213

214 Hayward (1990) devised a method for constraining the average trend of porphyroblast  
215 FIAs in a sample using a radial set of vertical thin sections in which the asymmetry (i.e.  
216 curvature sense) of inclusion trails is recorded. Where the asymmetry flips between two thin  
217 sections, the FIA passes between them. We successfully applied the method in 5 Ile de Groix  
218 samples, whose average FIAs are shown in Fig. 2b. FIAs are constrained to within 30° trend  
219 ranges but 10° for samples G7 from which 2 extra thin sections were cut. Additionally, the  
220 plunge direction was determined from the asymmetry of inclusion trails in horizontal thin  
221 sections.

222 In the next section it will be shown that average FIAs can be matched to specific  
223 orientation maxima seen in the rose diagrams for inclusion trails strikes (Fig. 2b), although  
224 not necessarily the strongest maximum. In sample G12 a correlation is not possible, though,  
225 due to large variation of individual FIAs about a mean vector whose trend does not match the  
226 strikes of associated inclusion-trails.

227 No results average FIAs could be determined in samples G18 and G20 as no clear  
228 asymmetry switch was observed between the different thin sections. In fact, most thin  
229 sections contain inclusion trails showing opposite curvature senses, probably reflecting the  
230 presence of more than just one FIA sets in these samples with different orientations. G3, G13  
231 and G15 contained mostly straight inclusion trails and insufficient numbers of  
232 asymmetrically curved ones to apply the technique.

233

## 234 7. X-ray tomography

235

### 236 7.1. Sample G11

237

238 G11 is a blueschist from 'Amer' in the SE of the island (Fig. 2a). It contains garnet  
239 porphyroblasts as well as rectangular pseudomorphs composed of a mixture of white mica,  
240 chlorite, albite and epidote after lawsonite probably (Cogné et al., 1966; Felix & Fransolet,  
241 1972; Ballèvre et al., 2003). Lawsonite relics have never been found, though, and some  
242 authors have argued that the replaced mineral was plagioclase (Shelley & Bossière, 1999).  
243 Lawsonite, as a high-pressure mineral, should have grown partially synchronous with garnet  
244 on a prograde path, whereas plagioclase is more likely to have formed during retrogression.  
245 G11 therefore provides us with an opportunity to investigate the relative timing of garnet and  
246 hence the origin of pseudomorphs from a microstructural perspective.

247 Inclusion trails in garnet vary from simple to sigmoidal to spiral-shaped but do not  
248 curve more than about 90° from the center to the rim (Figs. 5a, b, c, g and 6). We used the Fiji  
249 image-analysis software (Schindelin et al., 2012) to measure the spatial orientation of  
250 relatively straight inclusion-trails or inclusion-trail segments visible in our tomographic scans  
251 (Tiff image stacks). This was done by fitting the strike and pitch angles of these elements,  
252 measured on 3 mutually orthogonal (virtual) sections, to great circles. The curvature axes of  
253 inclusion-trails or 'FIA' were measured using the radial slicing technique detailed in Aerden &  
254 Ruiz-Fuentes (2020) which is completely analogous to the thin-section based technique of  
255 Hayward (1990) and Bell et al. (1995).

256 The X-ray scan of G11 revealed the existence of relatively large elongate crystals with  
257 high X-ray attenuation (higher than garnet) and hence density, which in section were  
258 identified as an Fe-rich opaques, partially or completely replaced by brown-reddish goethite  
259 (Fig. 5d, h). Some of these opaques attain porphyroblast sizes and contain scarce inclusion  
260 trails. Reflected-light imaging showed that the opaque phase is a mixture of ilmenite and  
261 magnetite, the latter possibly replacing the former. The shape orientation of these crystals was  
262 characterized by automatic calculation of best-fit ellipsoids using Fiji's *BoneJ* plugin (Doube  
263 et al., 2010). Ellipsoid long-axes (X) strongly align with the macroscopic  
264 mineral/stretching/intersection lineation, whereas the XY planes lie in the plane of the matrix  
265 foliation.

266 Garnets with sigmoidal- or spiral-shaped inclusion trails in sample G11 were  
267 measured both in the center and in the rims where they become strongly deflected or



268 truncated by younger inclusion trails. The porphyroblast-rim measurements tightly define a  
269 steeply SW dipping plane, whereas porphyroblast-core foliations vary significantly from  
270 steeply NW dipping to shallowly W-dipping. Intersection lines of core and rim planes  
271 measured in the same porphyroblast agree well with the FIAs measured independent by  
272 virtual radial-slicing. FIAs dip moderately west in the sample, and confirmed the average FIA  
273 trend already deduced from the radial thin sections (Fig. 2b). The orientations measured for  
274 simple (straight) inclusion trails coincide with the ones measured in the cores and rims of  
275 sigmoidal and spiral-shaped trails, suggesting they represent both microfabrics and grew at  
276 different times. Based on the above data we may confidently interpret the bimodal inclusion-  
277 trail strikes in the rose diagram for G11 as reflecting the same two sets of inclusion trails with  
278 an older NNW-SSW striking and a younger WNW-ESE striking set.

279 Lawsonite pseudomorphs in G11 also exhibit visible inclusion trails in the X-ray scans  
280 (Fig. 5e, f, and h) although these are less finely spaced and well defined as in garnet. These  
281 trails have a straight to weakly sigmoidal geometry oblique to the matrix foliation and  
282 subparallel to inclusion trails in garnet-rim. This suggests lawsonite growth after garnet cores  
283 but synchronous with garnet rims, consistent with previously reported large pseudomorphs  
284 sometimes including garnet (e.g. Ballèvre et al., 2003). Significantly, the asymmetry or  
285 curvature sense of inclusion trails in the pseudomorphs is opposite as in garnets when viewed  
286 in a N-S vertical sections. This implies a component of top-to-the-S shearing during the  
287 growth of porphyroblast cores, followed by top-to-the-N shearing when the garnet rims and  
288 lawsonite developed. Interestingly, Philippon et al. (2009) proposed the same shear-sense  
289 reversal (top-to-N140, then top-to-N350) from different sets of shear bands in the area of  
290 Amer, but note that their interpretation is only compatible with the observed inclusion-trail  
291 curvature senses if one accepts a 'non-rotational' origin.

292

## 293 7.2. Sample G12

294

295 G12 is a similar blueschist as G11 from the same outcrop but no lawsonite  
296 pseudomorphs were found in it. The tomographic data for this sample reveals an early NNW-  
297 SSE striking foliation preserved in porphyroblast cores and as simple inclusion trails,  
298 overprinted by a steeply S-dipping foliation preserved in garnet rims. The garnet-rim foliation  
299 is in turn deflected or truncated by a subhorizontal crenulation cleavage that causes  
300 transposition in the matrix and constitutes the composite 'main foliation'. The same opaque  
301 minerals as described in G11 are also present with the difference that now also occur as large

302 inclusions within garnets, often occupying a central position suggesting that the garnets  
303 nucleated on those grains. Opaques in the matrix are strongly elongated NW-SE subparallel to  
304 the strike of inclusion trails in the garnets.

305 The above data allow confident correlation of the different peaks in the strike rose  
306 diagrams for G11 and G12 in Fig. 2b. These peaks correspond to (1) an early NE-SW striking  
307 foliation preserved in the cores of spiral-shaped inclusion trails, (2) a younger NNW-SSE  
308 striking foliation included in the cores of sigmoidal inclusion trails with variable dip angles,  
309 and (3) a still younger ESE-WNW foliation preserved in garnet rims and in lawsonite  
310 pseudomorphs. Note however that the average FIA trends determined for both samples are  
311 quite different falsely suggesting they record different deformation histories. This difference  
312 results from the variable dip angles of inclusion trails sharing the same strike and relatively  
313 steep plunges of FIAs.

314

### 315 7.3. Sample G14

316

317 G14 is another blueschist sample from Amer that contains numerous relatively small  
318 (1-2 mm) garnets with straight, sigmoidal or spiral-shaped inclusion-trails. The spiral patterns  
319 exhibit significantly greater curvature (up to 180°; Fig. 4b) as in G11 and G12. Unfortunately,  
320 only a few garnets had visible inclusion trails in the tomographic scan because of their very  
321 fine grain size and profuse fracturing of garnets. A few inclusion-trail planes could be  
322 measured plus 5 FIAs that plunge steeply in different directions (Fig. 7a).

323 The same elongate opaque crystals as found in G3, G11 and G12 are also present  
324 aligned with the macroscopic stretching/mineral lineation. Their XY planes (normal to Z)  
325 have variable dips but consistent N to NE strike parallel to that of most inclusion-trails (Fig.  
326 2b). An interesting fold structures outlined by an epidote-rich layer was found whose axial  
327 trace also trends NE-SW suggesting a genetic link with the inclusion trails further supported  
328 by the available 3D data (Fig. 7a). E-W sections through the fold (Fig. 7c) show its refolding  
329 with subhorizontal axial suggesting subvertical shortening and probably related to the  
330 horizontal crenulation cleavage in G7 (Fig. 4a). In plan view the fold is transected by N-S  
331 striking cleavage zones also outlined by irregularly folded quartz lenses (Fig. 7d).

332

### 333 7.4. Sample G3

334

335 G3 was collected close to Fort Nosterven on the east coast of the island, about 1 km south of  
336 Plage du Trech. Garnets in this glaucophane-epidote schist have well developed straight and  
337 sigmoidal inclusion trails whose strikes were measured in thin section. Unfortunately, the  
338 trails were poorly visible in the tomographic scan. The few that could be measured dip steeply  
339 NW, similar as the inclusion trails in garnet cores of samples G11 (Fig. 8a; compare with Fig.  
340 6). A correlation is also likely with the average FIA determined in sample G7 (collected a bit  
341 further north at Plage du Trech) and gently SSW plunging fold axes measured there by  
342 Audren (1974, unpublished data; Fig. 8b). One individual garnet FIA defined by sigmoidal  
343 inclusion trails could be constrained by virtual radial slicing. Inclusion-trails in the rim of this  
344 porphyroblast are approximately subvertical with N120 strike and hence can be correlated  
345 with inclusion trails in the garnet rims in G11 and G12.

346

## 347 8. Interpreted deformation history

348

349 The above microstructural data lead us to interpret a succession of 3 shortening  
350 directions that produced 3 sets of steeply dipping inclusion trails associated with different  
351 strike maxima. The preservation of their original orientations was possible due to non-  
352 rotational behavior of porphyroblasts. These foliations could may have alternated with  
353 subhorizontal ones related to intermitted gravitational collapse stages, but the predominantly  
354 moderate to steep plunges of FIAs in the samples studied with X-ray tomography suggests  
355 these events were in any case weak. Otherwise, predominantly subhorizontal FIA plunges  
356 would be expected (cf. Bell et al., 2005; Aerden & Ruiz-Fuentes, 2020). The latest  
357 subhorizontal cleavage however developed penetratively and caused extensive transposition  
358 earlier steep fabrics and related upright folds. The growth of garnet rims and lawsonite  
359 porphyroblasts was probably triggered by incipient development stages of this foliation (cf.  
360 Bell & Hayward, 1991\*) but would have ceased soon afterwards as the rocks were exhumed.

361 The earliest formed steep foliation with NE-SW strike preserved in G3, G11 and G14  
362 corresponds to orthogonal SE-NW crustal shortening. This early foliation was reoriented and  
363 modified in the matrix during the development of a younger N-S to NNE-SSW striking  
364 foliation. Its intersection with the pre-existing NE-SW foliation explains the steeply dipping  
365 FIA measured in G14. This event corresponded to ENE-WSW directed compression. A third  
366 steeply foliation dipping steeply south with E-W to WNW-strike is preserved in garnet rims  
367 and as simple inclusion trails in G11 and G12, as well as in lawsonite pseudomorphs of G11.  
368 It was created during N-E to NNE-SSW compression close to peak-metamorphic conditions

369 as this is when lawsonite is likely to have formed (Ballèvre et al., 2003). The presence of this  
370 foliation also in G3 and G14 is reflected in minor N100-N280 peaks in their strike rose  
371 diagrams (Fig. 2b) and confirmed by the 3D data (Figs. 7a and 8a).

372 In view of the above interpreted polyphase evolution, we must now reconsider the  
373 significance of predominantly anticlockwise curving inclusion trails in sections striking close  
374 to the regional lineation being viewed towards the west. We were not able to determine the  
375 ratio's of clockwise vs. anticlockwise ratio's associated with each of the 3 internal foliation  
376 sets that have been distinguished. However, it is likely that the curvature sense of inclusion  
377 trails in thin sections striking N330, N0, N30 and N60 is mainly determined by the oldest  
378 (NE-striking) and youngest (E-W striking) internal sets as these that intersect those thin  
379 section planes at a high angle. In contrast, the intermediate NNW-SSE striking inclusion trail  
380 set should produce opposite curvature senses in the same thin sections and this might be the  
381 reason why about 25% of all garnet porphyroblasts we counted curve in opposite direction as  
382 the other 75%.

383 In summary, the oldest NE-SW striking inclusion trails may be linked to NW directed  
384 subduction and SE directed thrusting. The polarity of the intermediate NNW-SSE striking  
385 internal foliation remains undetermined. The dominant asymmetry of the youngest WNW-  
386 ESE striking trails included in garnet rims of G11 and G12 and in lawsonite are consistent  
387 with N-directed subduction.

388 The reversed curvature sense of inclusion-trails in the pseudomorphs of sample G11  
389 indicates a change to top-to-the-N shearing on the penetrative subhorizontal crenulation  
390 cleavage, which caused refolding and transposition all previous fabrics and structures. Shelley  
391 and Bossière (2005) related this deformation to wholesale crustal thinning and exhumation.  
392 However, considering that HP metamorphism of Ile de Groix rocks is Late-Devonian (360-  
393 370Ma; Bosse et al., 2005) and that the Variscan orogeny continued until at least 300Ma, we  
394 vertical shortening can also be considered in the context of a gravitationally spreading thrust  
395 wedge with plate convergence and subduction continued below the wedge (cf. Bell &  
396 Johnson, 1992 - their Figs 16 and 17).

397

## 398 **9. Correlation of microstructural- and field data**

399

400 In this section we review field data from previous workers and assess their relationship  
401 with the new microstructural data. Cogné et al (1966) made numerous structural observations  
402 and measurements all along the coast of the island and concluded 2 principle deformation

403 phases, apart from a third post-metamorphic phase that created E-W trending chevron-type  
404 folds. Their first deformation was responsible for tight to isoclinal folds with strongly sheared  
405 limbs associated with a stretching/mineral lineation. The average trend of these 'fundamental  
406 folds' as they called them is N165 in the south east of the island, N-S in the east and changes  
407 to NW-SE in the north-west. The second deformation phase caused refolding of the  
408 'fundamental' folds associated with a steeply SW dipping crenulation cleavage trending N130-  
409 140. Significantly, Cogné et al. (1966) noticed that mineral lineations defined by glaucophane  
410 exhibit highly variable relationships with respect to fold axes, commonly being parallel to  
411 them, but locally oblique and clearly predating the folding, or still elsewhere associated with  
412 the younger refolding event. In this last case, 2 sets of glaucophane lineations were locally  
413 observed oblique to each other (see their Fig. 12, p 70).

414 Boudier and Nicolas (1976) distinguished 4 deformation phases (D1-D4), the youngest  
415 of which corresponds to the chevron-type structures of Cogné et al. (1966). D1 refers to the  
416 mineral-lineation ( $L_1$ ) which they interpreted to have been reoriented by N165 trending folds  
417 (D2 and D3). At an outcrop studied in particular detail at Vallon du Lavoir (Fig. 2a), a N120  
418 orientation maximum of  $L_1$  was found (Fig. 9b) and interpreted as the original trend. This  
419 opposes Cogné et al.'s (1966) interpretation of early N165 trending folds overprinted by  
420 younger N130 ones, which is in better agreement with our microstructural data. An  
421 unpublished sketch and corresponding orientation measurements by Claude Audren (1974;  
422 redrafted in Fig. 9a), held at the 'Maison de la Reserve Naturelle Le Bail' on Ile de Groix,  
423 further supports Cogné et al.'s (1966) and our interpretation by depicting refolding of a N165  
424 lineation around a N120 trending fold axes.

425 Quinquis & Choukroune (1980) endorsed a late origin of the N120 trending folds  
426 described by Cogné et al. (1966) but considered them post-metamorphic structures. In their  
427 view, the N120 maximum defined by glaucophane at Vallon du Lavoir is only coincidental  
428 and without regional tectonic significance. They predicted that on a regional scale the  
429 lineation varies symmetrically between N120 and N200 due to sheath folding driven by top-  
430 to-N340 progressive shearing. However, their interpretation was based principally on  
431 analogue modeling of sheath folds (Cobbold & Quinquis, 1980) rather than on new structural  
432 or microstructural data.

433 The above contradictory interpretations of the original orientation of  $L_1$  and its timing  
434 relative to folding are not surprising in view of the polyphase character of 'L1' associated with  
435 different foliations shown herein and recognized earlier by Cogné et al. (1966). Significantly,  
436 the bimodal trends of  $L_1$  seen in the field data Boudier & Nicolas (1976) collected across the

437 island (Fig. 9c, 10a) reflect the orientations of the 3 sets of inclusion trails distinguished in  
 438 this paper.

439

## 440 **10. Pouldu schists, Tréogat Formation and Central Armorican Domain samples**

441

442 The 'Pouldu schists' are greenschists of volcano-sedimentary origin (Triboulet, 1992)  
 443 locally hosting abundant plagioclase porphyroblasts. Inclusion trails in these crystals were  
 444 measured in 3 oriented samples (PO2, Po3, PO5) plus a fourth sample (AU-1) collected from  
 445 a similar greenschist unit known as the Tréogat Formation (Luck et al., 2002) cropping out in  
 446 the Baye d'Audièrne. Inclusion trails in these samples broadly strike E-W and are tentatively  
 447 correlated with the also E-W to WNW-ESE striking youngest internal foliation found in  
 448 garnets and lawsonite of Ile de Groix. Three of these samples contain a N060 striking  
 449 crenulation cleavage in the matrix, which is included in the rims of some porphyroblasts.

450 (NOTE TO EDITOR AND REVIEWERS: we have not received on time 4 N-S striking  
 451 vertical thin sections of these samples, in which we plan to determine the curvature sense of  
 452 inclusion trails. We hope to incorporate that extra data in a later version of this manuscript).

453 Two staurolite-kyanite schists from the Central Armorican Domain, located about 5km  
 454 NNE of Quimper, were also studied. The age of metamorphism in these 2 samples is roughly  
 455 constrained by granite ages to the period of 350-320Ma (Schulz et al., 1998), and hence post-  
 456 dates the high-pressure metamorphism (360-370Ma) of Ile de Groix. Inclusion trails in these  
 457 samples trend N060 and my correlate with the N060 crenulation cleavage observed in the  
 458 matrix of our greenschist samples.

459

## 460 **11. Discussion**

461

### 462 *11.1. Comparison with inclusion-trails in NW-Iberia*

463

464 Figure 10 compares our new inclusion-trail data from Brittany are compared with that  
 465 of Aerden (2004) for the Basal Unit of the allochthonous complexes of NW-Iberia. This unit  
 466 comprises orthogneises and high-pressure micaschists retrogressed in greenschist facies  
 467 representing the subducted margin of Gondwana (Arenas et al, 1995; Martínez-Catalán, 1996)  
 468 with a similar structural position as the Pouldu Schists, below an ophiolitic unit. Three sets of  
 469 inclusion trails striking E-W, NE-SW and NNW-SSE were distinguished in this unit  
 470 preserved in plagioclase and garnet porphyroblasts. The oldest of these with E-W trend were

471 related to the high-pressure event dated 370-360Ma (Van Calsteren et al., 1979; Santos  
472 Zalduegui, et al. 1995; Abati et al., 2010; Li & Massonne, 2017), and hence synchronous with  
473 the metamorphism of Ile de Groix (Bosse et al., 2005). The 2 younger internal foliations sets  
474 formed at lower pressures and their age was only loosely constrained to pre-320 Ma.

475 To account for the Cretaceous anticlockwise rotation of Iberia during formation of the  
476 Gulf of Biscay, the current northern margin Iberian is placed back against the conjugate  
477 margin of south Brittany in Fig. 10 implying 20° clockwise back-rotation of Iberia. Although  
478 this reconstruction produces a good match of inclusion-trail strikes in both massifs (Fig. 10b),  
479 it poses question around the relative timing evidence of Aerden (2004). He interpreted that the  
480 (presently) NNW-SSE striking inclusion trails in the Basal Unit (colored blue in Fig. 9)  
481 postdate E-W striking ones (yellow), opposite to what has been concluded herein. As he  
482 based this on only a sample with bimodal strikes of inclusion trails (sample 1. - Fig. 9a) we  
483 believe there is scope for re-assessing the relative timing of Aerden (2004) using X-ray  
484 tomography.

485 In contrast, the relative timing of NW-SE striking inclusion trails in NW Iberia  
486 (marked with red lines in Fig. 9) was based on more abundant microstructural and field  
487 criteria. Consequently, these microstructures cannot be correlated with much older NW-SE  
488 trails in samples of Ile de Groix, but a correlation is possible with internal foliations in the 2  
489 samples from the Central Armorican Domain, and the crenulation cleavages in the Pouldu  
490 schists (Fig. 2c and d).

491 We checked the curvature sense of inclusion trails in Aerden's (2004) thin sections  
492 associated with the W-E to NW-SE FIAs (marked yellow in Fig. 10a) this author determined  
493 in 6 samples of the Basal-Unit. In samples 3-4, 10, 14 and 20, inclusion trails curve  
494 anticlockwise viewing west. In samples 2 and 19 they curve clockwise. A larger number of  
495 anticlockwise trails is as observed in Ile de Groix, but we realize that more samples need to be  
496 studied before firm conclusions can be drawn regarding thrusting directions in NW Iberia.

497

### 498 *11.2. Origin of sheath folds*

499

500 Based on a study of quartz fabrics in 57 samples, Shelley and Bossière (1999)  
501 concluded that many of the folds of Ile de Groix island nucleated with their axes subparallel  
502 to the maximum stretching direction (X) instead of parallel to Y and subsequently rotating  
503 towards X by progressive shearing (cf. Quinquis and Choukroune, 1981). Both models  
504 assume a single progressive deformation with subhorizontal flow plane that ignores the



505 polyphase character of the main foliation and lineation shown herein. This complexity places  
 506 the significance of fold-axes parallel stretching lineations and the origin of non-cylindrical  
 507 folds in a quite different light. We interpret these as having formed by vertical flattening  
 508 superposed on folds with steeply dipping axial planes and variably plunging fold-axes (Fig.  
 509 10). Depending on the original geometry of precursor folds, new folds nucleated with straight  
 510 axes parallel to X or with strong curvature.

511

## 512 12. Conclusion

513

514 (1) The blueschist-eclogite facies rocks of Ile de Groix experienced 4 successive  
 515 tectonic events potentially reflected in a also complex PT path (Schulz et al., 2001).  
 516 Corresponding fabrics are preserved as inclusion trails that maintained their original  
 517 orientations due to limited or no rotation of porphyroblasts during ductile deformation.

518 (2) In specific orientations and dominant curvature sense of inclusion trails allow the  
 519 following reconstruction. (Stage-I) Early NW-directed subduction of Gondwana. (Stage-2) E-  
 520 W crustal shortening with unconstrained subduction polarity, but probably to westward given  
 521 the preceding subduction direction. (Stage III) Northward subduction until peak metamorphic  
 522 conditions were reached. (Stage IV) Exhumation associated with vertical shortening and a  
 523 component of top-to-the-north shearing indicated by the asymmetry of inclusion trails in  
 524 lawsonite pseudomorphs as well as late shear bands (Philippon et al, 2009). A subhorizontal  
 525 crenulation cleavage associated with this event transposes all earlier fabrics. Inclusion-trails  
 526 studied in 4 additional greenschist samples from the lower-grade footwall of the Groix  
 527 ophiolite strike E-W, parallel to the youngest set of inclusion trails in the blueschist samples  
 528 from the island.

529 (3) The curvature sense of sigmoidal and spiral-shaped inclusion trails indicates top-  
 530 to-the south thrusting which agrees with regional-geological evidence only when a 'non-  
 531 rotational' original of these microstructures is accepted. The traditional 'rotational'  
 532 interpretation implied an opposite and shear sense conflicting with the regional tectono-  
 533 metamorphic structure of southern Brittany.

534 (4) The strikes of 3 sets of inclusion trails documented herein can be tentatively  
 535 correlated with 3 similar sets reported earlier in NW-Iberia (Aerden, 2004). The coincidence  
 536 of microstructural directions between both regions is maximized assuming only 20° rotation  
 537 of Iberia during opening of the Gulf of Biscay, significantly less as ca. 35° rotation generally  
 538 concluded from paleomagnetic data (Gong et al., 2009).



539 (5) Fold axes parallel to stretching lineations and rare sheath folds reported on Groix  
 540 did not form by progressive uni-direction shearing, but by vertical shortening and horizontal  
 541 shearing superposed on steeply dipping pre-existing foliations and folds with variable plunges.

542

### 543 **Acknowledgements**

544

545 The first author wishes to thank José Ramón Martínez Catalán for his support and  
 546 friendship ever since he started a postdoc in Salamanca in 1996. We thank Michel Ballèvre  
 547 for helping us obtain permission to collect samples on Ile de Groix and for suggesting we  
 548 sample the Pouldu schists as well. Ile de Groix national-park guide Catherine Robert (and her  
 549 dog) provided Aerden with helpful information and pleasant company during field work.  
 550 Bernhardt Schulz is thanked for clarifying various aspects about the petrology of the studied  
 551 rocks. This research was partially funded by a travel grant from Junta de Andalucía to Aerden  
 552 in 2006. ...Reviewers, Editors.....

553

### 554 **References**

555

- 556 Aerden, D.G.A.M., (1995) Porphyroblast non-rotation during crustal extension in the  
 557 Variscan Pyrenees. *Journal of Structural Geology* 17, 709-726.
- 558 Aerden, D.G.A.M., (1998) Tectonic evolution of the Montagne Noire and a possible orogenic  
 559 model for syn-collisional exhumation of deep rocks, Hercynian belt, France. *Tectonics* 17,  
 560 62-79.
- 561 Aerden, D.G.A.M., (2004) Correlating deformations in the Iberian Massif (Variscan belt)  
 562 using porphyroblasts; implications for the development of the Ibero-Armorican Arc.  
 563 *Journal of Structural Geology* 26, 177-196.
- 564 Aerden, D.G.A.M., Bell, T.H., Puga, E., Sayab, M., Lozano, J.A., Díaz de Federico, A.,  
 565 (2013) Multi-stage mountain building vs. Relative plate motions in the Betic Cordillera  
 566 deduced from integrated microstructural and petrological analysis of porphyroblast  
 567 inclusion trails. *Tectonophysics* 587, 188-206.
- 568 Aerden, D.G.A.M., Ruiz-Fuentes, A., (2020) X-ray computed microtomography of spiral  
 569 garnets: A new test of how they form. *Journal of Structural Geology* 136.  
 570 <https://doi.org/10.1016/j.jsg.2020.104054>
- 571 Arenas, R., Rubio Pascual, F., Díaz García, F., Martínez Catalán, J.R., (1995) High-pressure  
 572 micro-inclusions and development of an inverted metamorphic gradient in the Santiago

- 573 Schists (Ordenes Complex, NW Iberian Massif, Spain): evidence of subduction and  
574 syncollisional decompression. *Journal of Metamorphic Geology* 13, 141–164.
- 575 Arenas, R., Sanchez Martinez, S., Diez Fernandez, R., Gerdes, A., Abati, J., Fernandez-  
576 Suarez, J., Andonaegui, P., Cuadra, P.G., Carmona, A.L., Albert, R., Fuenlabrada, J.M.,  
577 Rubio Pascual, F.J., (2016) Allochthonous terranes involved in the Variscan suture of NW  
578 Iberia: A review of their origin and tectonothermal evolution *Earth-Science Reviews* 161,  
579 140-178.
- 580 Azor, A., Rubatto, D., Simancas, J.F., González Lodeiro, F., Martínez Poyatos, D.,  
581 MartínParra, L.M., Matas, J., (2008) Rheic Ocean ophiolitic remnants in southern Iberia  
582 questioned by SHRIMP U–Pb zircon ages on the Beja-Acebuches amphibolites. *Tectonics*  
583 27, TC5006.
- 584 Balleve, M; Pitra, P; Bohn, M., (2003) Lawsonite growth in the epidote blueschists from the  
585 Ile de Groix (Armorican Massif, France): a potential geobarometer. *Journal of*  
586 *Metamorphic Geology* 21, 723-735.
- 587 Ballèvre, M., Bosse V., Ducassou, C., Pitra. P., (2009) Palaeozoic history of the Armorican  
588 Massif: Models for the tectonic evolution of the suture zones. *C. R. Geoscience* 341 (2009)  
589 174–201.
- 590 Balleve, M., Bosse, V., Dabard, M.P., Ducassou, C., Fourcade, S. et al., (2015) Histoire  
591 Géologique du massif Armoricaïn : Actualité de la recherche. *Bulletin de la Société*  
592 *Géologique et Minéralogique de Bretagne, Société géologique et minéralogique de*  
593 *Bretagne*, (2013, (D), 10-11, pp.5-96. <insu-00873116>
- 594 Bell, T.H., (1985) Deformation partitioning and porphyroblast rotation in metamorphic rocks:  
595 A radical reinterpretation. *Journal of Metamorphic Geology* 3, 109-118.
- 596 Bell. T. H., Rubenach, M. J. & Flemming, P. D., (1986) Porphyroblast nucleation, growth and  
597 dissolution in regional metamorphic rocks as a function of deformation partitioning during  
598 foliation development. *Journal of Metamorphic Geology*, 4, 37–67.
- 599 Bell, T.H, Sapkota, J., (2012) Episodic gravitational collapse and migration of the mountain  
600 chain during orogenic roll-on in the Himalayas. *Journal of Metamorphic Geology* 30, 651-  
601 666.
- 602 Bell, T. H., & Sanislav, I. V., (2011) A deformation partitioning approach to resolving the  
603 sequence of fold events and the orientations in which they formed across multiply  
604 deformed large-scale regions. *Journal of Structural Geology*, 33(7), 1206–1217.  
605 <https://doi.org/10.1016/j.jsg.2011.03.014>

- 606 Bell, T.H., Forde, A., Wang, J., (1995) A new indicator of movement direction during  
607 orogenesis - measurement technique and application to the Alps. *Terra Nova* 7, 500-508.
- 608 Bell, T.H., Hickey, K.A., Upton, G.J.G., (1998) Distinguishing and correlating multiple  
609 phases of metamorphism accross a multiply deformed region using the axes of spiral,  
610 staircase, and sigmoidally curved inclusion trails in garnet. *Journal of Metamorphic*  
611 *Geology* 16, 767-794.
- 612 Bell, T.H., Johnson, S.E., Davis, B., Forde, A., Hayward, N., Wilkins, C., (1992)  
613 Porphyroblast inclusion-trail orientation data: eppure non son girate! *Journal of*  
614 *Metamorphic Geology* 10, 295-307.
- 615 Bosse V., Ballèvre M., Vidal O., (2002) Ductile thrusting recorded by the garnet isograd from  
616 blueschist-facies metapelites of the Île de Groix, Armorican Massif, France. *Journal of*  
617 *Petrology* 43, 485-510.
- 618 Bosse, V., Féraud, G., Ballèvec, M., Peucat, J.J., Corsini, M., (2005) Rb–Sr and  $^{40}\text{Ar}/^{39}\text{Ar}$   
619 ages in blueschists from the Ile de Groix (Armorican Massif, France): Implications for  
620 closure mechanisms in isotopic systems. *Chemical Geology* 220 (2005) 21– 45.
- 621 Cannat, M., (1985) Quartz microstructures and fabrics in the island of Groix (Brittany,  
622 France). *Journal of Structural Geology* 7, 555–562
- 623 Cobbold, P.R., Quinquis, H., (1980) Development of sheath folds in shear regimes. *Journal of*  
624 *Structural Geology* 2, 119-126.
- 625 Cogné J., Daniel, J., Ruhland, M., (1966) L'Ile de Groix. Etude structurale d'une série  
626 métamorphique à glaucophane en Bretagne méridionale. In: *Bulletin du Service de la carte*  
627 *géologique d'Alsace et de Lorraine*, 19-1, pp. 41-96. doi :  
628 <https://doi.org/10.3406/sgeol.1966.1298>
- 629 Díaz García, F., Arenas, R., Martínez Catalán, J.R., González del Tánago, J., and Dunning,  
630 G.R., (1999) Tectonic evolution of the Careón ophiolite (northwest Spain): A remnant of  
631 the oceanic lithosphere in the Variscan Belt. *Journal of Geology*, v. 107, p. 587–605.
- 632 Doube M, Kłosowski MM, Arganda-Carreras I, Cordelières F, Dougherty RP, Jackson J,  
633 Schmid B, Hutchinson JR, Shefelbine SJ. (2010) BoneJ: free and extensible bone image  
634 analysis in ImageJ. *Bone* 47:1076-9. doi: 10.1016/j.bone.2010.08.023
- 635 Faure, M., Bé Mézème, E., Cocherie, A., Rossi, P., Chemenda, A., Boutelier, D., (2008)  
636 Devonian geodynamic evolution of the Variscan Belt, insights from the French Massif  
637 Central and Massif Armoricaïn, *Tectonics*, 27, TC2005, doi:10.1029/2007TC002115.

- 638 Felix, C., Fransolet, A.M., (1972) Pseudomorphes á epidote s.l., paragonite, muscovite s.l.,  
639 chlorite, albite. de porphyroblastes de lawsonite (?) dans les glaucophanites de l'Île de  
640 groix (bretagne – France). *Annales de la Société Géologique de Belgique* 95, 323–334.
- 641 Gong, Z., Langereis, C.G., Mullender, T.A.T. , (2008) The rotation of Iberia during the  
642 Aptian and the opening of the Bay of Biscay. *Earth and Planetary Science Letters* 273, 80–  
643 93.
- 644 Hayward, N., (1990) Determination of early fold axis orientations in multiply deformed rocks  
645 using porphyroblast inclusion trails. *Tectonophysics* 179, 353-369.
- 646 Hayward, N., (1992) Microstructural analysis of the classical spiral garnet porphyroblasts of  
647 south-east Vermont: evidence for non-rotation. *Journal of Metamorphic Geology* 10, 567-  
648 587.
- 649 Huddleston-Holmes, C.R., Ketcham, R.A., (2005) Getting the inside story: using computed  
650 X-ray tomography to study inclusion trails in garnet porphyroblasts. *American*  
651 *Mineralogist* 90. DOI: 10.2138/am.2005.1840.
- 652 Huddleston-Holmes, C.R., Ketcham, R.A., (2010) An X-ray computed tomography study of  
653 inclusion trail orientations in multiple porphyroblasts from a single sample.  
654 *Tectonophysics* 480, 305–320.
- 655 Kim, H.S., Sanislav, I.V. (2017). Foliation intersection/inflection axes within porphyroblasts  
656 (FIAs): a review of advanced applications and significance. *Geosciences Journal* 21,  
657 1013-1032. <http://dx.doi.org/10.1007/s12303-017-0047-z>
- 658 Lagarde, J.L. (1980). La déformation des roches dans les domaines à schistosité  
659 subhorizontale. Applications à la nappe du Canigou-Roc de France (Pyrénées orientales) et  
660 au complexe crystallophyllien de Champtoceaux (Massif armoricain). Unpublished PhD  
661 thesis, Université de Rennes, 170 p.
- 662 Li, B., Massonne, H.J., (2017) Contrasting metamorphic evolution of metapelites from the  
663 Malpica-Tuy unit and the underlying so-called parautochthon at the coast of NW Spain.  
664 *Lithos* 286–287, 92–108. <http://dx.doi.org/10.1016/j.lithos.2017.06.003>
- 665 Mares, V.M., (1998) Structural development of the Soldiers Cap Group in the Eastern Fold  
666 Belt of the Mt Isa Inlier: a successive of horizontal and vertical deformation events and  
667 large-scale shearing. *Aust. J. Earth Sci.* 45, 373–387.
- 668 Martínez Catalaín, J.R., Arenas, R., Díaz García, F., Rubio Pascual, F.J., Abati, J., Marquínez,  
669 J., (1996) Variscan exhumation of a subducted Palaeozoic continental margin: the basal  
670 units of the Ordenes Complex, Galicia, NW Spain. *Tectonics* 15, 106–121.

- 671 Martínez-Catalán, J.R., (2012) The Central Iberian arc, an orocline centered in the Iberian  
672 Massif and some implications for the Variscan belt. *Int J Earth Sci (Geol Rundsch)*  
673 101:1299–1314. DOI 10.1007/s00531-011-0715-6
- 674 Munro, M. A., & Blenkinsop, T. G. (2012). MARD - A moving average rose diagram  
675 application for the geosciences. *Computers & Geosciences*, 49, 112–120.  
676 <https://doi.org/10.1016/j.cageo.2012.07.012>
- 677 Philippon M., Brun J.-P. et Gueydan F., (2009) Kinematic records of subduction and  
678 exhumation in the Île de Groix blueschists (Hercynian belt ; Western France). *Journal of*  
679 *Structural Geology* 31, 1308-1321.
- 680 Quinquis, H., Audren, C., Brun, J. P. & Cobbold, P. R. (1978) Intense shear in Ile de Groix  
681 blueschists and compatibility with subduction or obduction. *Nature, Lond.* 273, 43-45.
- 682 Quinquis, H., (1980) Schistes bleus et déformation progressive: l'exemple de l'Île de Groix  
683 (Massif Armoricaïn). Université de Rennes 1.
- 684 Quinquis, H., Choukroune, P., (1981) The Ile de Groix blueschists in the Hercynian chain -  
685 kinematical implications. *Bulletin de la societe geologique de France* 2, 409-418.
- 686 Rosenfeld, J.L., (1970) Rotated garnets in metamorphic rocks. *Geological Society of America*  
687 *Special Paper* 129, 102pp.
- 688 Sayab, M., (2005) Microstructural evidence for N–S shortening in the Mount Isa Inlier (NW  
689 Queensland, Australia): the preservation of early W–E-trending foliations in  
690 porphyroblasts revealed by independent 3D measurement techniques. *Journal of Structural*  
691 *Geology* 27, 1445-1468.
- 692 Shah, S.Z. Sayab, M., Aerden, D.G.A.M, Asif-Kahn, M. (2011) Foliation intersection axes  
693 preserved in garnet porphyroblasts from the Swat area, NW Himalaya: A record of  
694 successive crustal shortening directions between the Indian plate and Kohistan-Ladakh  
695 Island Arc. *Tectonophysics* 509, 14-32.
- 696 Shelley, D., Bossière, G., (1999) Ile de groix: retrogression and structural developments in  
697 an extensional régime. *Journal of Structural Geology* 21, 1441–1455.
- 698 Schindelin, J., Arganda-Carreras, I., Frise, E., Kaynig, V., Longair, M., Pietzsch, T., Preibisch,  
699 S., Rueden, C., Saalfeld, S., Schmid, B., Tinevez, J.Y., White, D.J., Hartenstein, V.,  
700 Eliceiri, K., Tomancak, P., Cardona, A., (2012) Fiji: an open-source platform for  
701 biological-image analysis. *Nature Methods* 9, 676-682.
- 702 Schulz, B., Triboulet., C., Audren., C; Pfeifer., H.R., Gilg, A., (2001) Two-stage prograde and  
703 retrograde Variscan metamorphism of glaucophane-eclogites, blueschists and greenschists  
704 from Ile de Groix (Brittany, France) *International Journal of Earth Sciences*, 90, 871-889.

705 Spry, A., 1633) The origin and significance of snowball structure in garnet. *Journal of*  
 706 *Petrology* 4, 211-222.

707 Stallard, A.R., Hickey, K.A., Upton, G.J., (2003) Measurement and correlation of  
 708 microstructures: the case of foliation intersection axes. *Journal of Metamorphic Geology*  
 709 21, 241–252.

710 Triboulet, C., (1974) Les glaucophanites et roches associées de l'île de Groix (Morbihan,  
 711 France): étude minéralogique et pétrogénétique. *Contributions to Mineralogy and*  
 712 *Petrology*, 45, 65–90.

713 Zwart, H., (1962) On the determination of polymorphic mineral associations and its  
 714 application to the Bosost area (central Pyrenees). *Geologisches Rundschau*, 52, 38-65.

715

716

717

#### FIGURE CAPTION

718

719 Fig. 1. Simplified geological maps of southern Brittany and NW-Iberia showing the location  
 720 of ophiolite outcrops and samples studied herein and by Aerden (2004) in NW Iberia.

721

722 Fig. 2. (a) Stretching lineation pattern of Ile de Groix and sample locations. (b) Moving-  
 723 average rose diagrams for inclusion-trail strikes. Encircled pie-cake symbols represent  
 724 average FIA trends in samples determined from radial thin sections and the FIA plunge  
 725 direction. Also the sense of inclusion-trail curvature is indicated viewing down the FIA  
 726 plunge (anticlockwise in G14, G12, G11; clockwise in G19 and G7). (c) Data for samples  
 727 from the Pouldu schistes (PO2, 3, 5) and the Tréogat formation (AU1). Arrows represent  
 728 crenulation axes in the matrix. (d) Data for 2 staurolite-kyanite schists from the Central  
 729 Armorican Domain. The 4 inclusion-trail sets proposed in this paper are marked with magenta,  
 730 blue, yellow and red trend lines, from the oldest to the youngest set.

731

732 Fig. 3. (a) Rotational interpretation of sigmoidal and spiral-shaped inclusion trails from Ile de  
 733 Groix and the range (purple) of inclusion trail strikes predicted by this model. (b) 'Non-  
 734 rotational' interpretation of the same inclusion trails according to Bell et al (1986) and Bell &  
 735 Johnson (1989) consistent with orthogonal truncations and inclusion trails striking subparallel  
 736 to stretching lineations, crenulation- and fold-axes. (c) Strikes measured in all 10 samples  
 737 from Groix agree better with the non-rotational model.

738

739 Fig. 4. (a) Sketches of well developed 'rotational' inclusion trails in oriented vertical thin  
 740 sections of samples G7 and G14 showing vertical and horizontal alignment of internal  
 741 truncations (purple lines). (b) Rose diagram plotting the orientations of all individual dashes  
 742 that make up the dashed lines representing inclusion trails in the drawings measured with the  
 743 image/analysis program *Fiji*. The plot demonstrates bimodal orientations of the inclusion  
 744 trails related to the orthogonal sets of truncations.

745  
 746 Fig. 5. All photographs of G11. (a and b) Garnet porphyroblast (parallel and crossed polars)  
 747 with sigmoidal trails in a N-S striking vertical section. Barb of N-arrow points upward. Note  
 748 top-to-the south shear sense suggested by asymmetric strain shadows, inconsistent with  
 749 porphyroblast rotation. (c) Garnet with spiral-shaped truncation inclusion trails a  
 750 porphyroblast core and rim zone. (d) Opaque mineral with elongate shape replaced by  
 751 Goethite. (e and f). Lawsonite pseudomorphs (parallel and crossed polars) showing weakly  
 752 sigmoidal inclusion trails oblique to the matrix foliation. (g) Tomographic image of a strongly  
 753 curved inclusion trails garnet in G12. (h) Tomographic image of an elongate lawsonite  
 754 pseudomorph, garnet (Gt) and opaque large opaque crystal.

755  
 756 Fig. 6. Stereoplots (equal angle, lower hemisphere) of internal foliations and FIAs measured  
 757 in garnet and lawsonite pseudomorphs in samples G11 and G12. Also shown are 2 contoured  
 758 stereoplots plotting maximum and minimum elongation directions of relatively large opaques  
 759 present in the matrix of G11 and G12. See legend. The data can be matched to different sets  
 760 of inclusion trails drawn with corresponding colors in garnets and a representative lawsonite  
 761 pseudomorphs. The Mn concentration map is for one of the porphyroblasts with truncational  
 762 inclusion trails.

763  
 764 Fig. 7. Tomographic images and microstructural data for sample G14. (a) Stereoplot of  
 765 internal foliation planes, FIAs (grey boxes), long- and short axes of opaque minerals, and the  
 766 axial plane of cm-scale folds. (b and c) Map- and cross-section views of a fold outlined by an  
 767 epidote-rich layer. Its axial trace trends NNE-SSW oblique to N-S trending cross-cutting  
 768 cleavage zones also visible in (d). The cross-section shows refolding with subhorizontal axial  
 769 planes suggesting a component of vertical flattening associated with the main cleavage  
 770 (compare with Fig. 4a, b).

771

772 Fig. 8. (a) 3D microstructural data for sample G3. See legend for explanation. (b) Field data  
773 collected by Claude Audren about 1 km north of at the location of sample G7 (Plage du  
774 Trech) and the average FIA trend we determined for this sample from radial thin sections  
775 (magenta pie-cake segment). The FIA trend coincides with fold axes measured in the field.  
776 Note that this conflicts with models assuming sheath folding and porphyroblast rotation.  
777 Stretching lineations vary greatly reflecting the polyphase origin of this fabric.

778  
779 Fig. 9. (a) Structural data collected by C. Audren and a corresponding sketch of isoclinal folds  
780 he drew at Vallon de Kérigant (location marked in Fig. 2a). The sketch is accurately redrafted  
781 and data re-plotted in lower hemisphere, equal angle projection (Audren used upper  
782 hemisphere, equal angle). Refolding of a N165 trending lineation around the nose of a N120  
783 trending fold is demonstrated. (b) Lineations (L1) measured nearby (a) by Boudier & Nicolas  
784 (1976) at Vallon du Lavoir showing a N120 trend maximum of L1 (yellow lines) oblique to  
785 B2 fold axes in the same outcrop (blue lines). (c) Structural data from the same authors for the  
786 entire island. Note the bimodal pattern of L1. Magenta, blue and yellow trend lines show how  
787 this data can be correlated with the 3 sets of inclusion trails given the same colors in Figs 2, 5,  
788 7 and 8.

789  
790 Fig. 10. (a) Inclusion trails-strikes in the newly studied rocks and those measured by Aerden  
791 (2004) in 18 samples from the Basal Unit of NW-Iberia. The microstructures are correlated as  
792 4 age sets marked with magenta, blue, yellow and red trend bars (from older to younger sets).  
793 Field data from Boudier and Nicolas (1976) and that of Engels (1972) and van Zuuren (1969)  
794 also show a good match. (b) Rose diagrams plotting inclusion-trail directions marked blue  
795 and yellow for different amounts of Iberia back-rotation. The directions line up best with 20°  
796 back-rotation, which is the current angle between the North-Iberia margin and that of southern  
797 Brittany.

798  
799 Fig. 11. Conceptual models showing how vertical shortening and horizontal stretching can  
800 produce highly variable fold geometries depending on the original orientations of folded  
801 planes or pre-existing folds. Note how strongly curved fold axes can form without need of  
802 extremely large shears trains. Adding a (horizontal) shearing component in the direction of X  
803 and/or Y can be expected to further modify the fold-interference patterns.tt



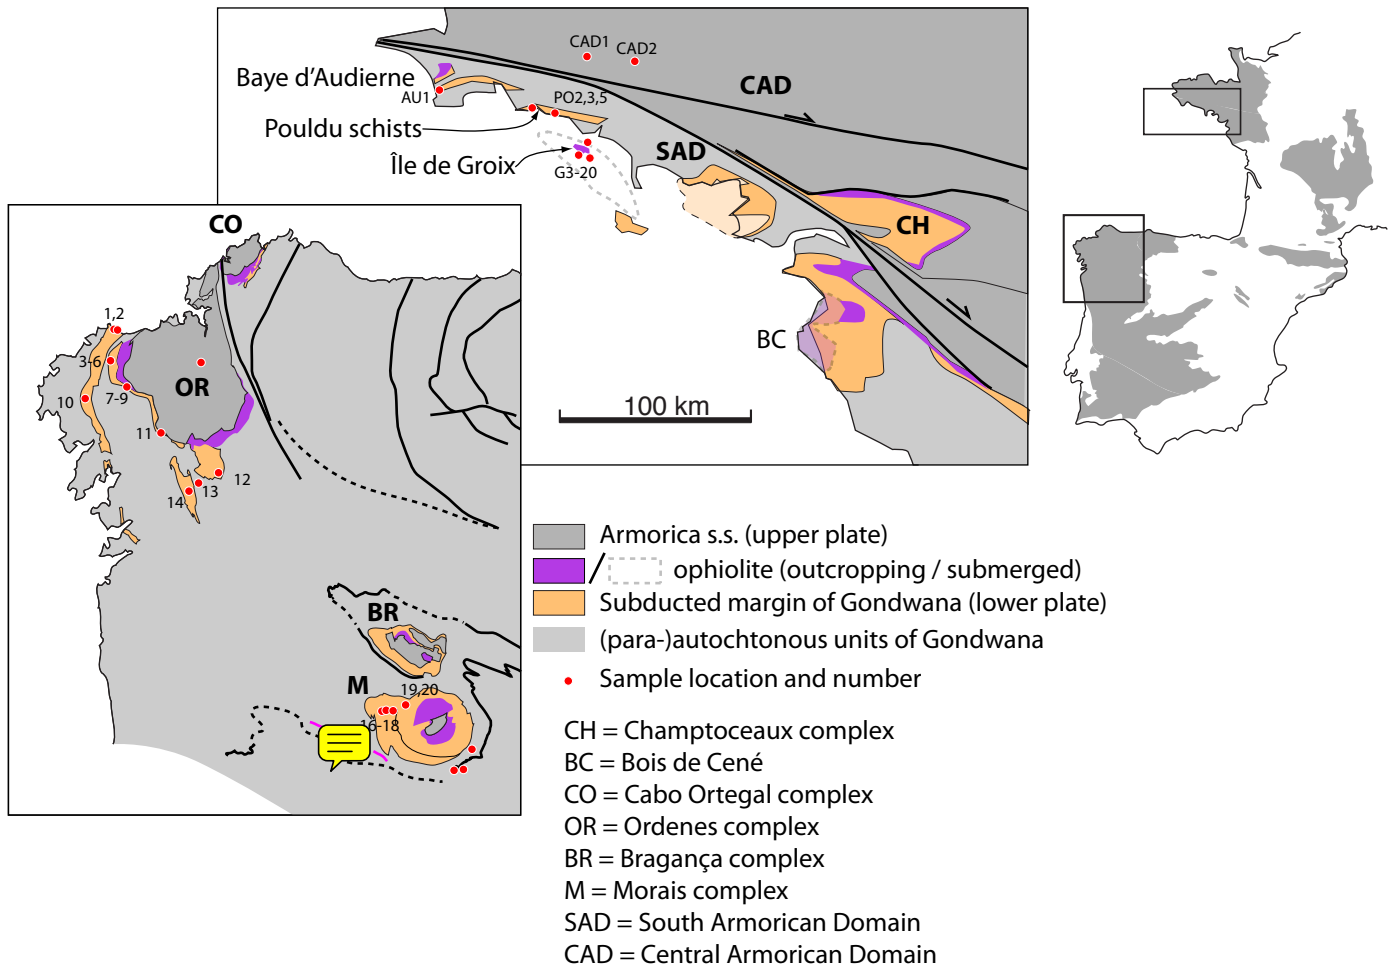

FIG. 1

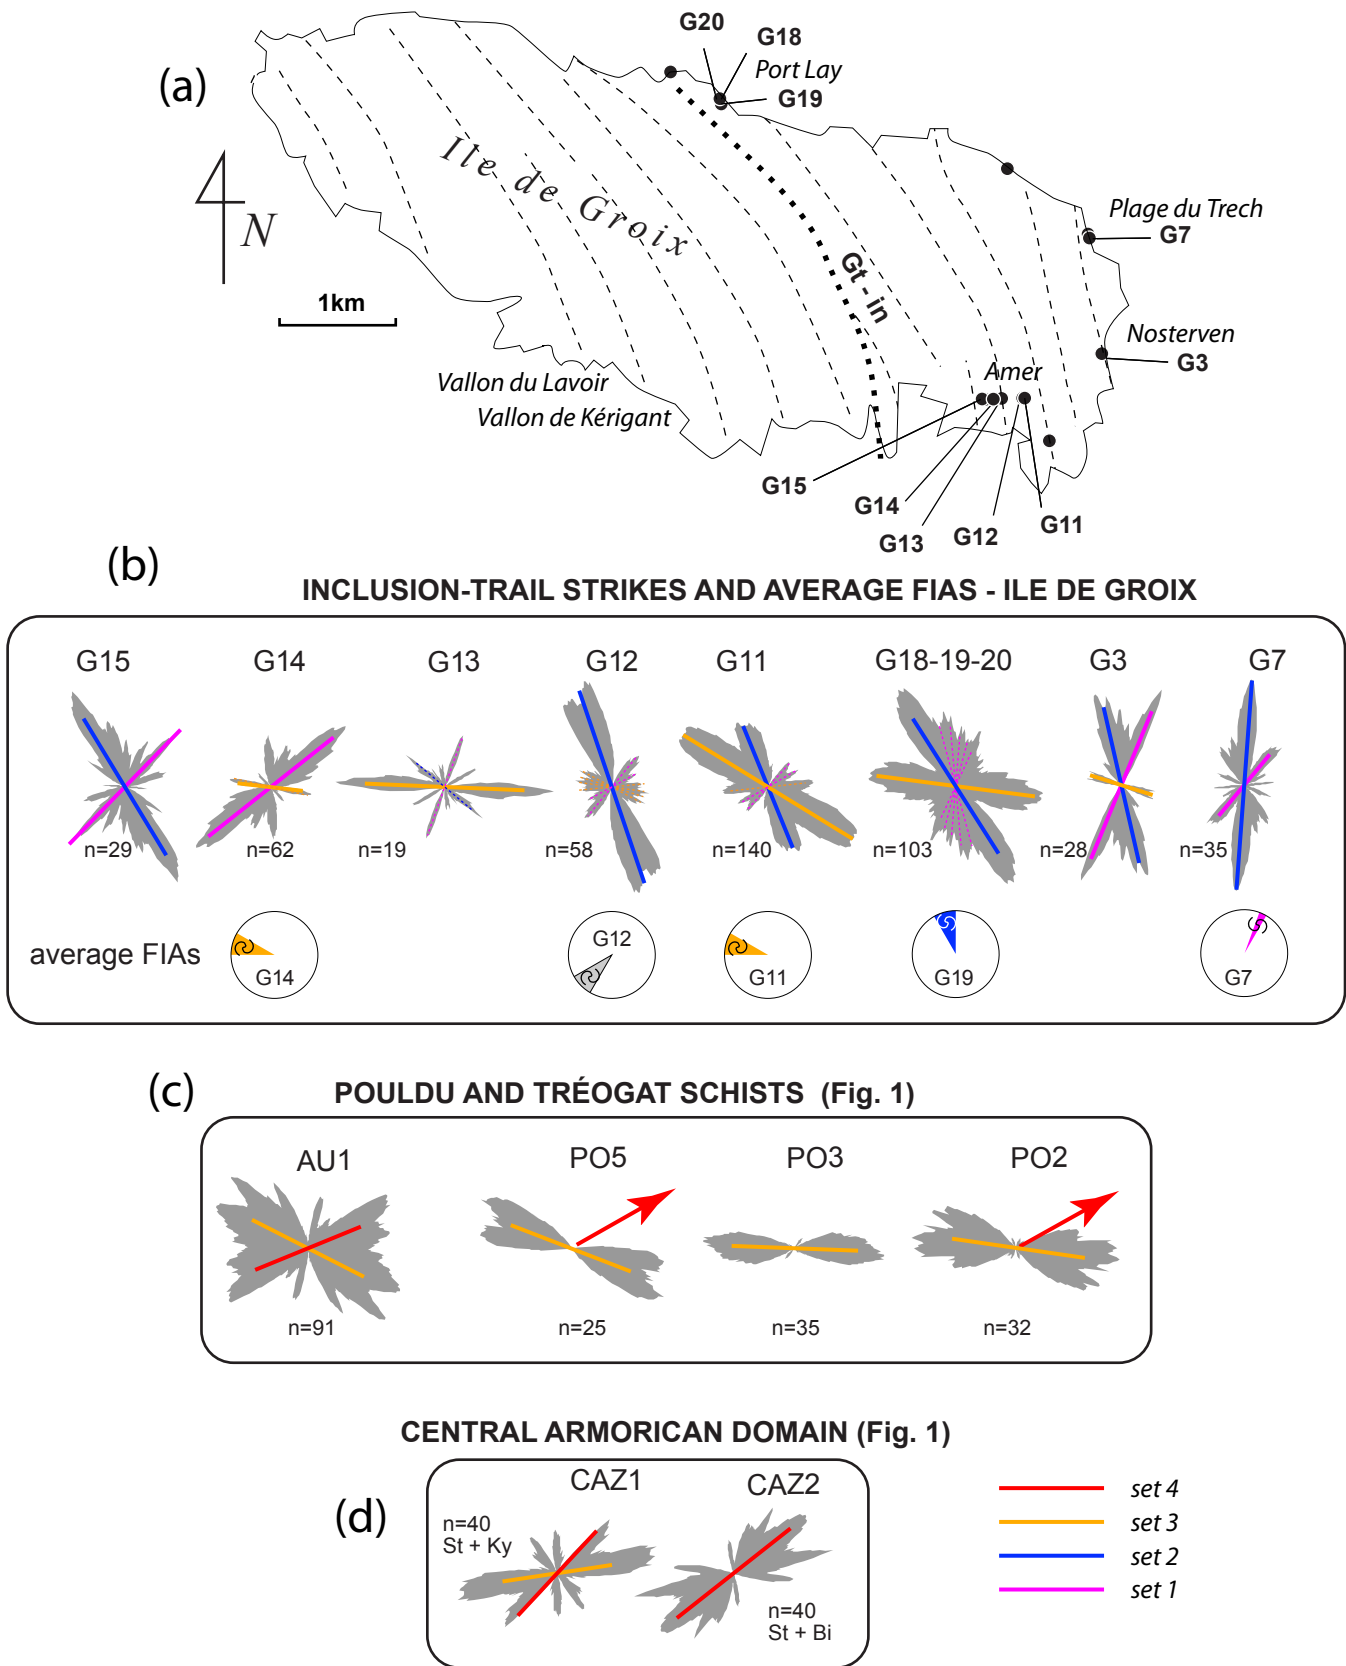

FIG. 2

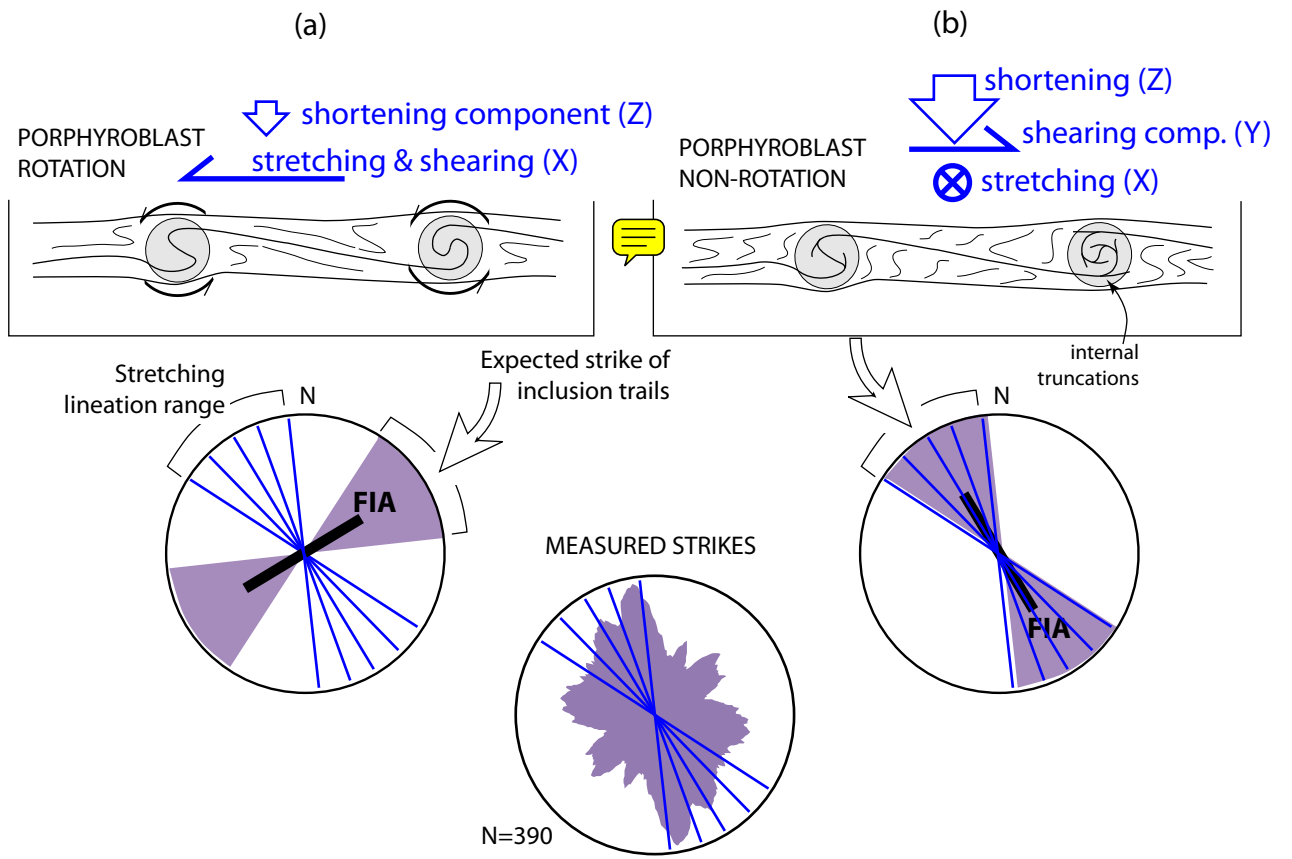

FIG. 3

**(a) Sample G-7**

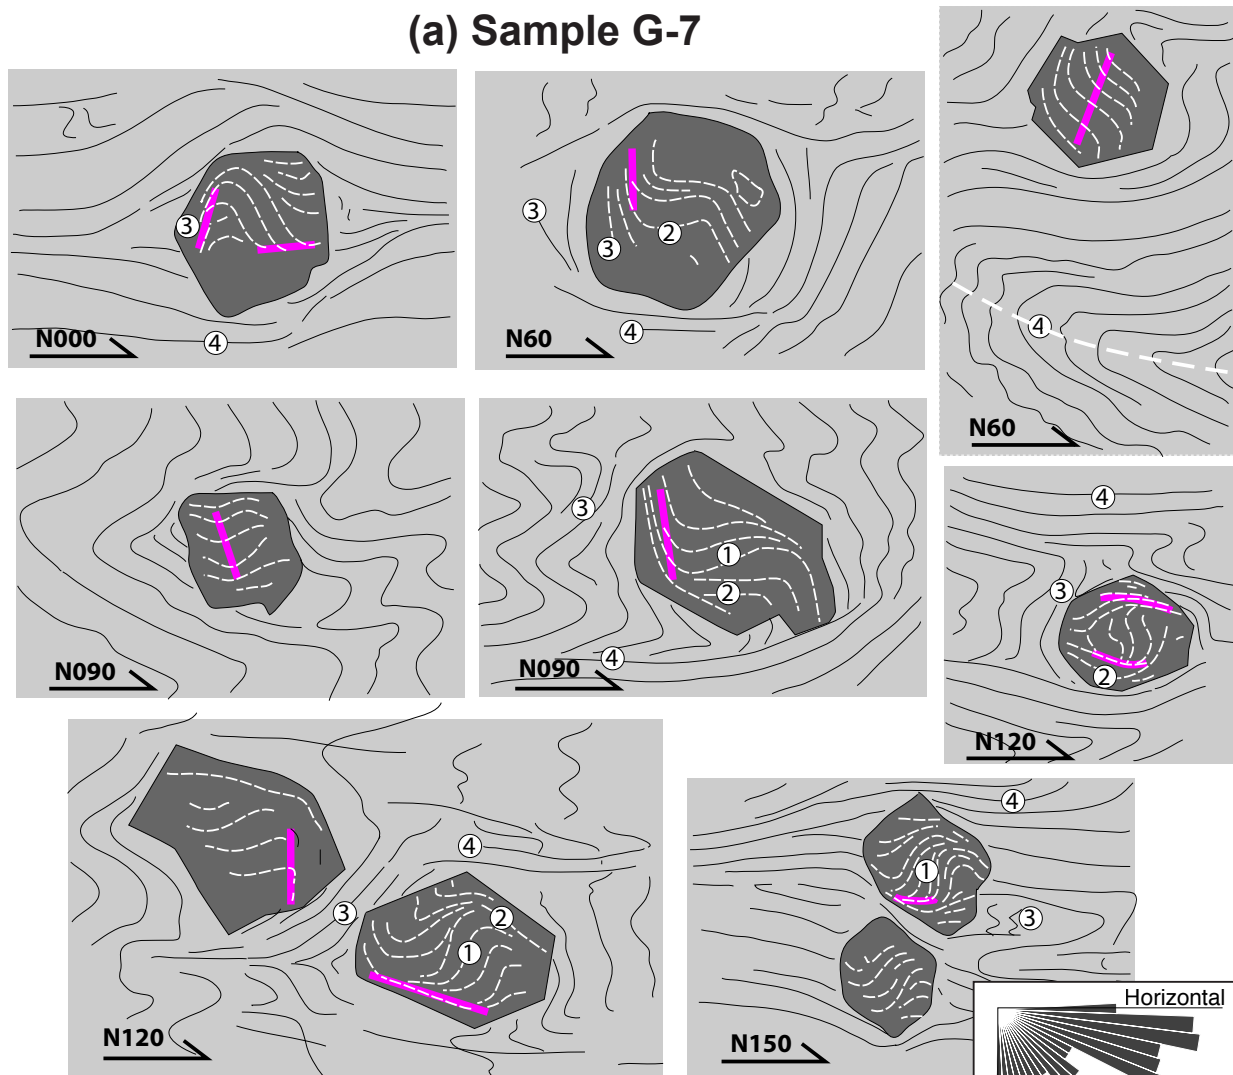

**(b) Sample G-14**

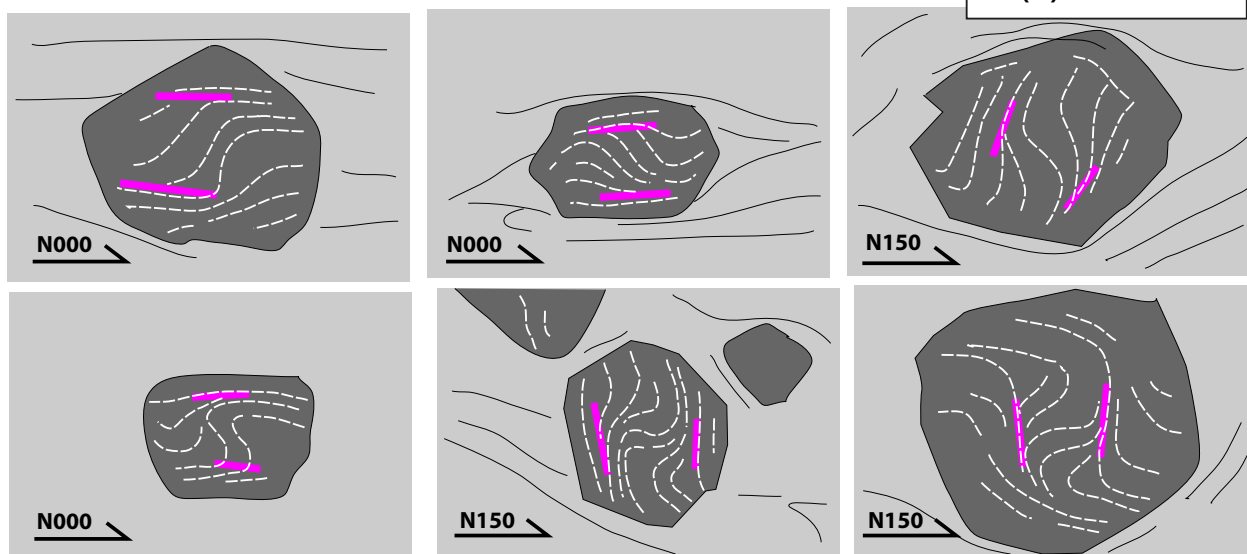



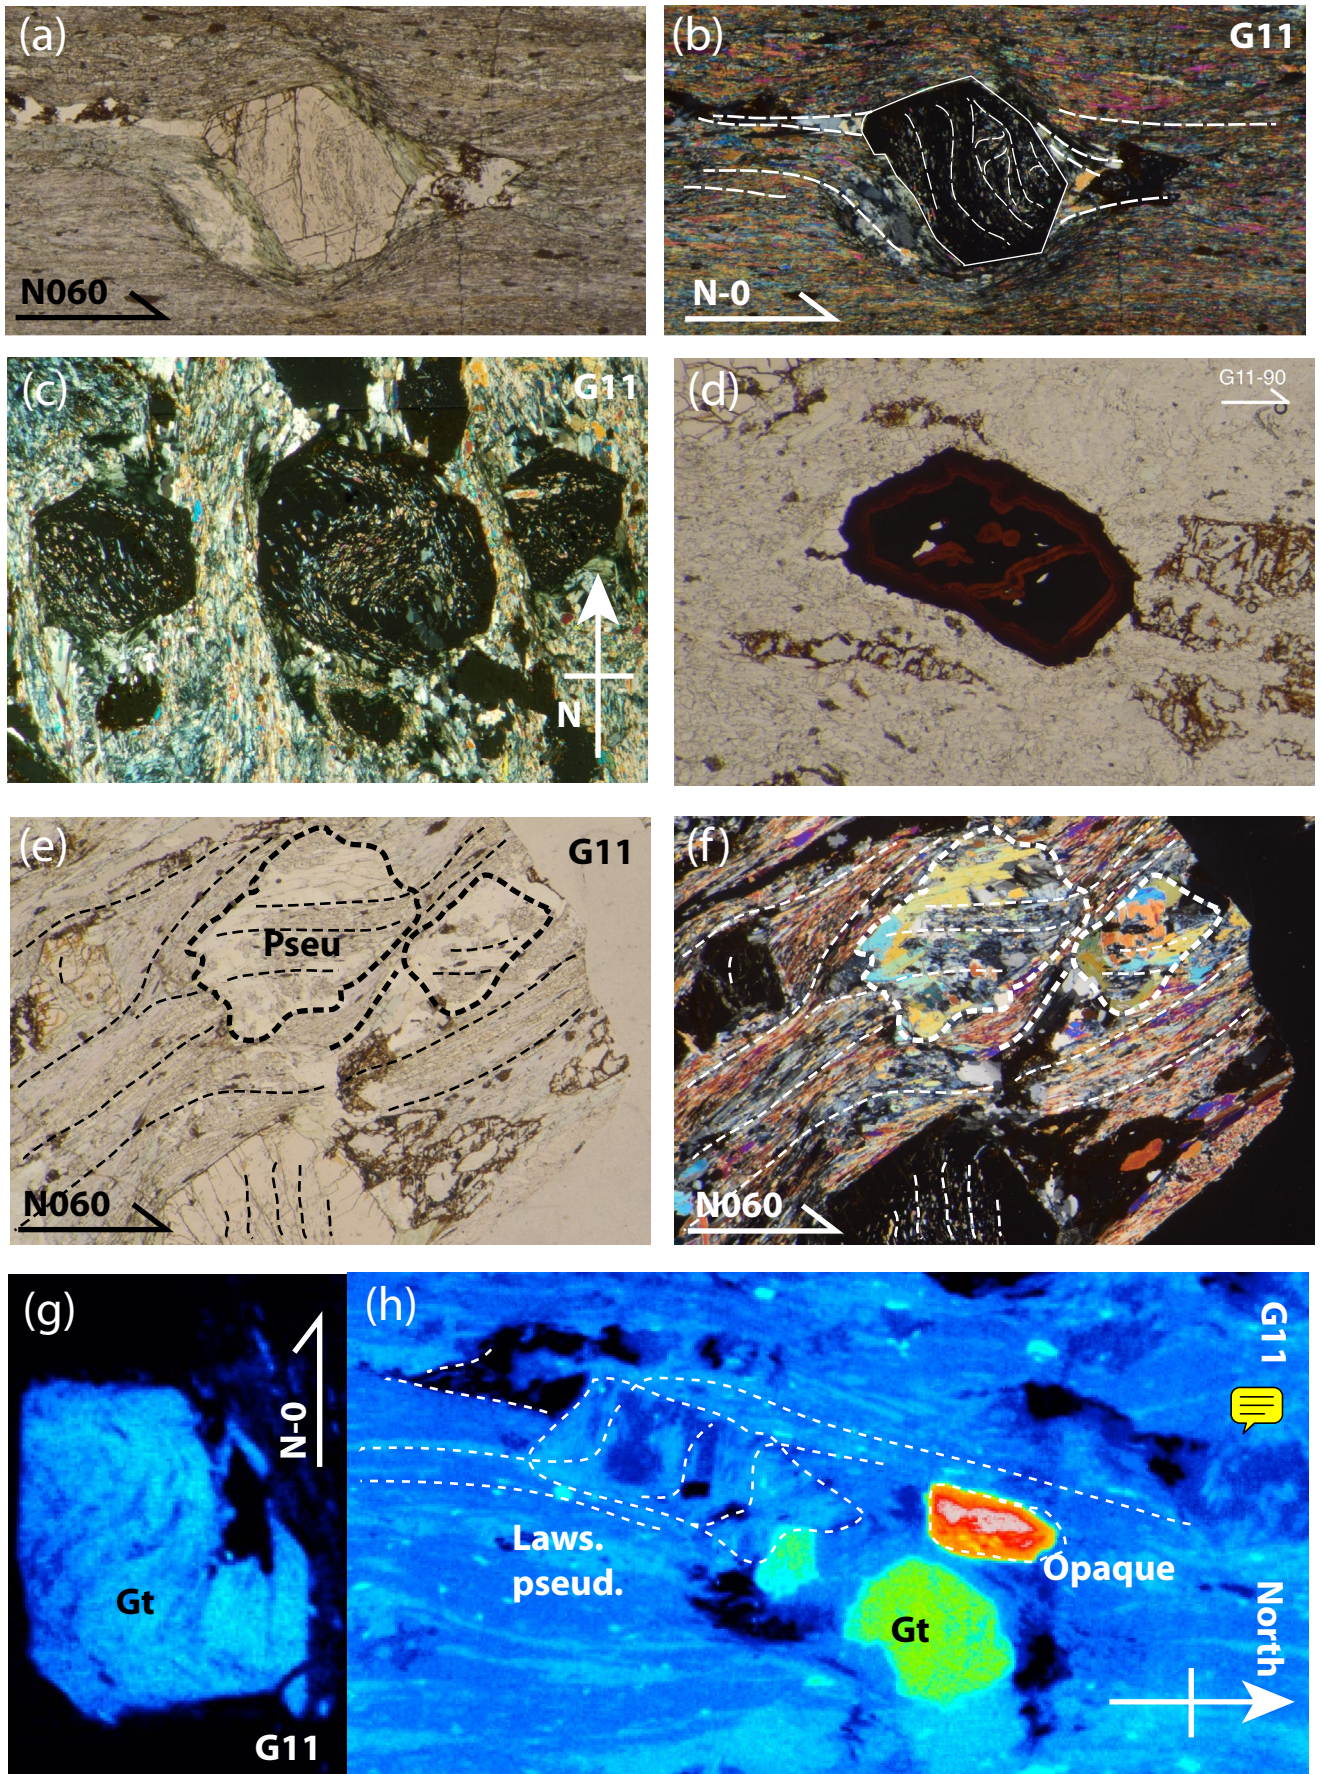

FIG. 5



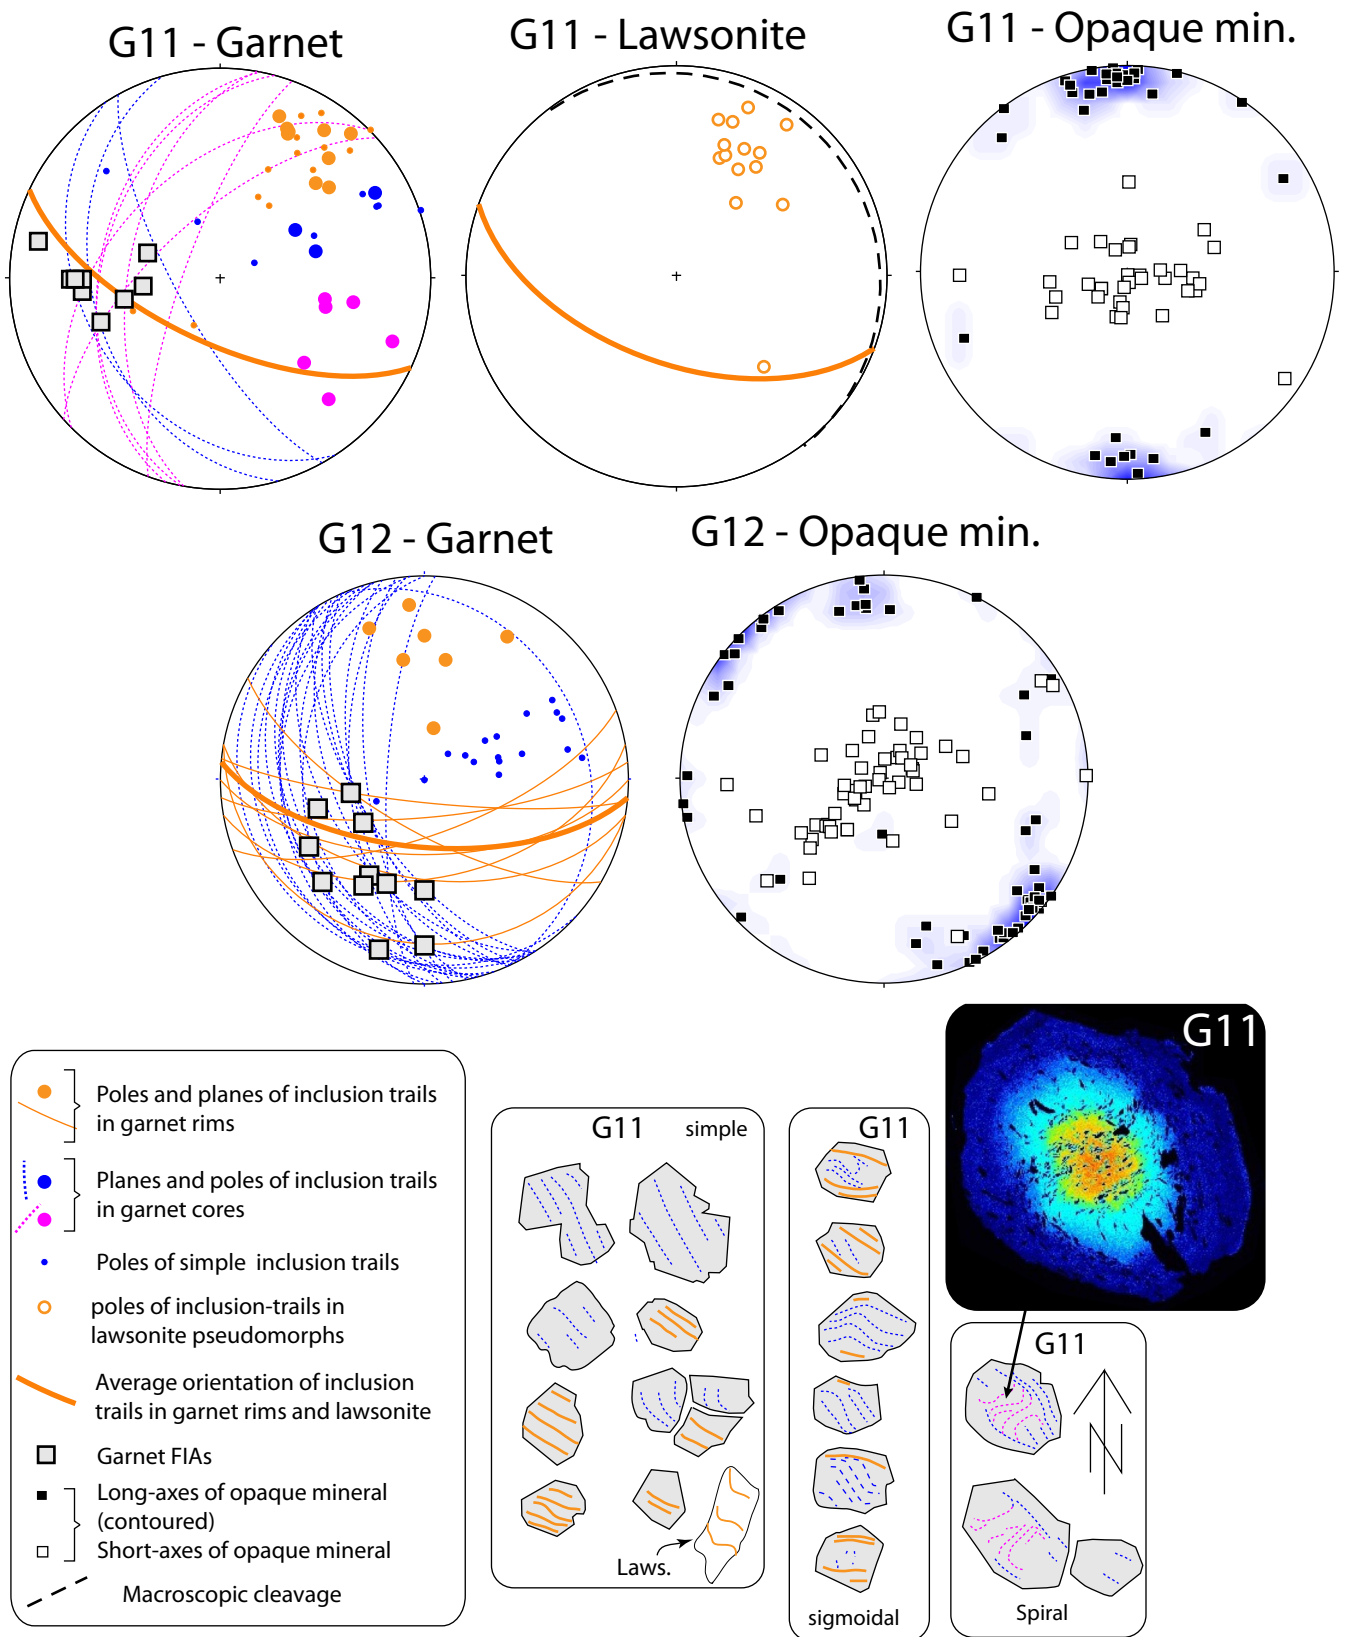

FIG. 6

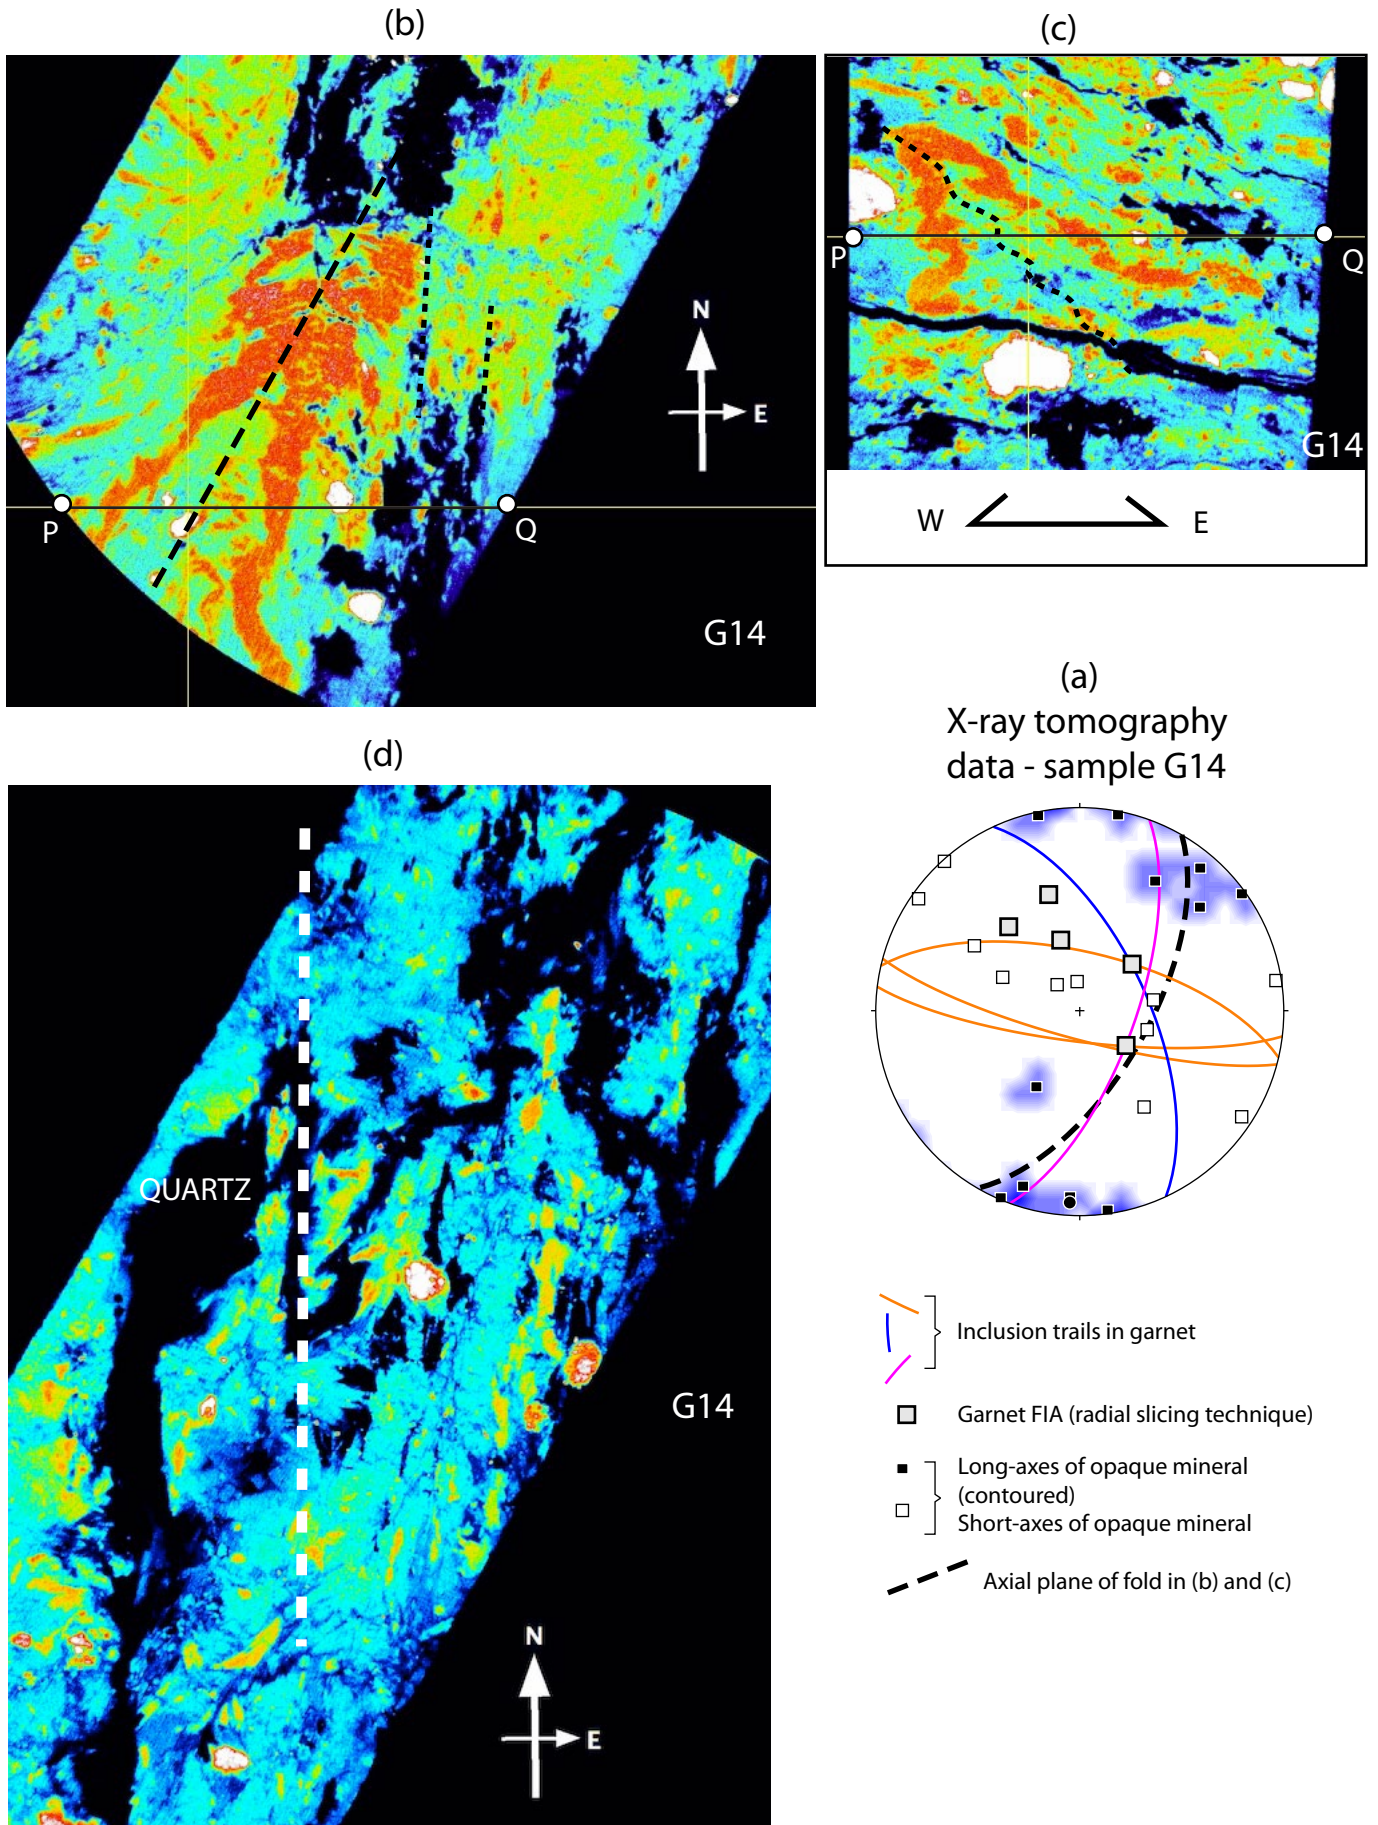

FIG. 7

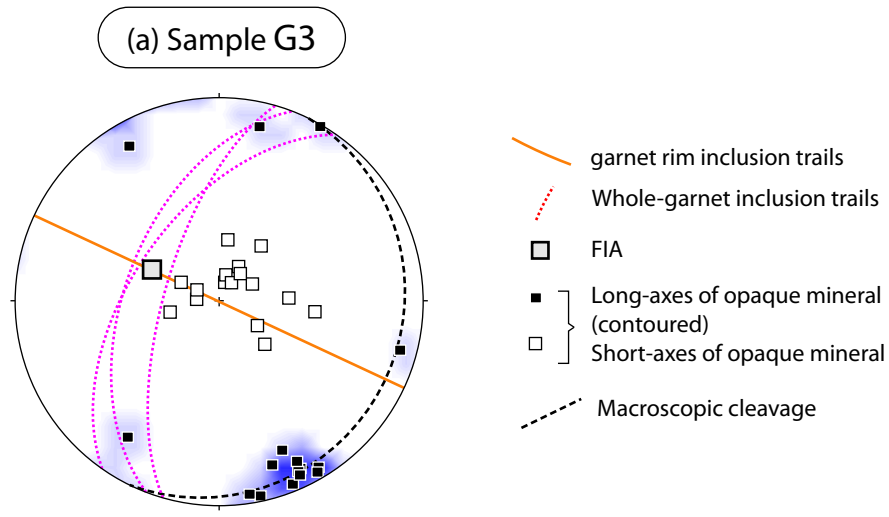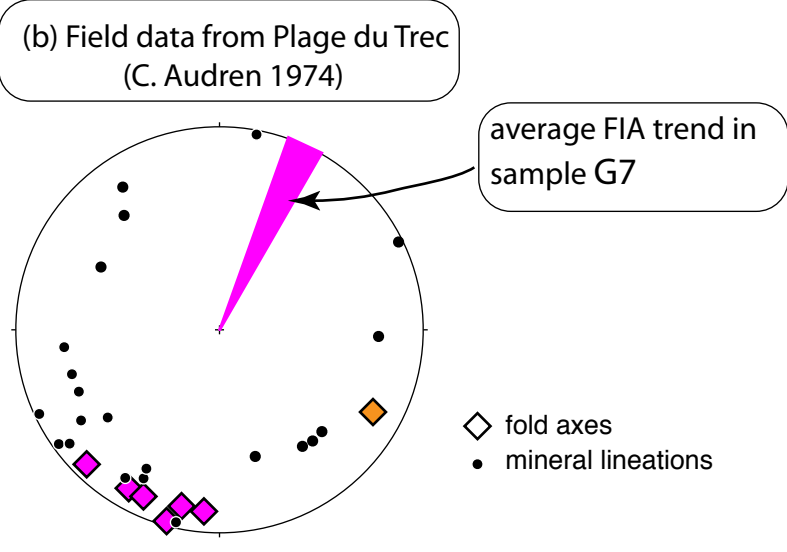

FIG. 8



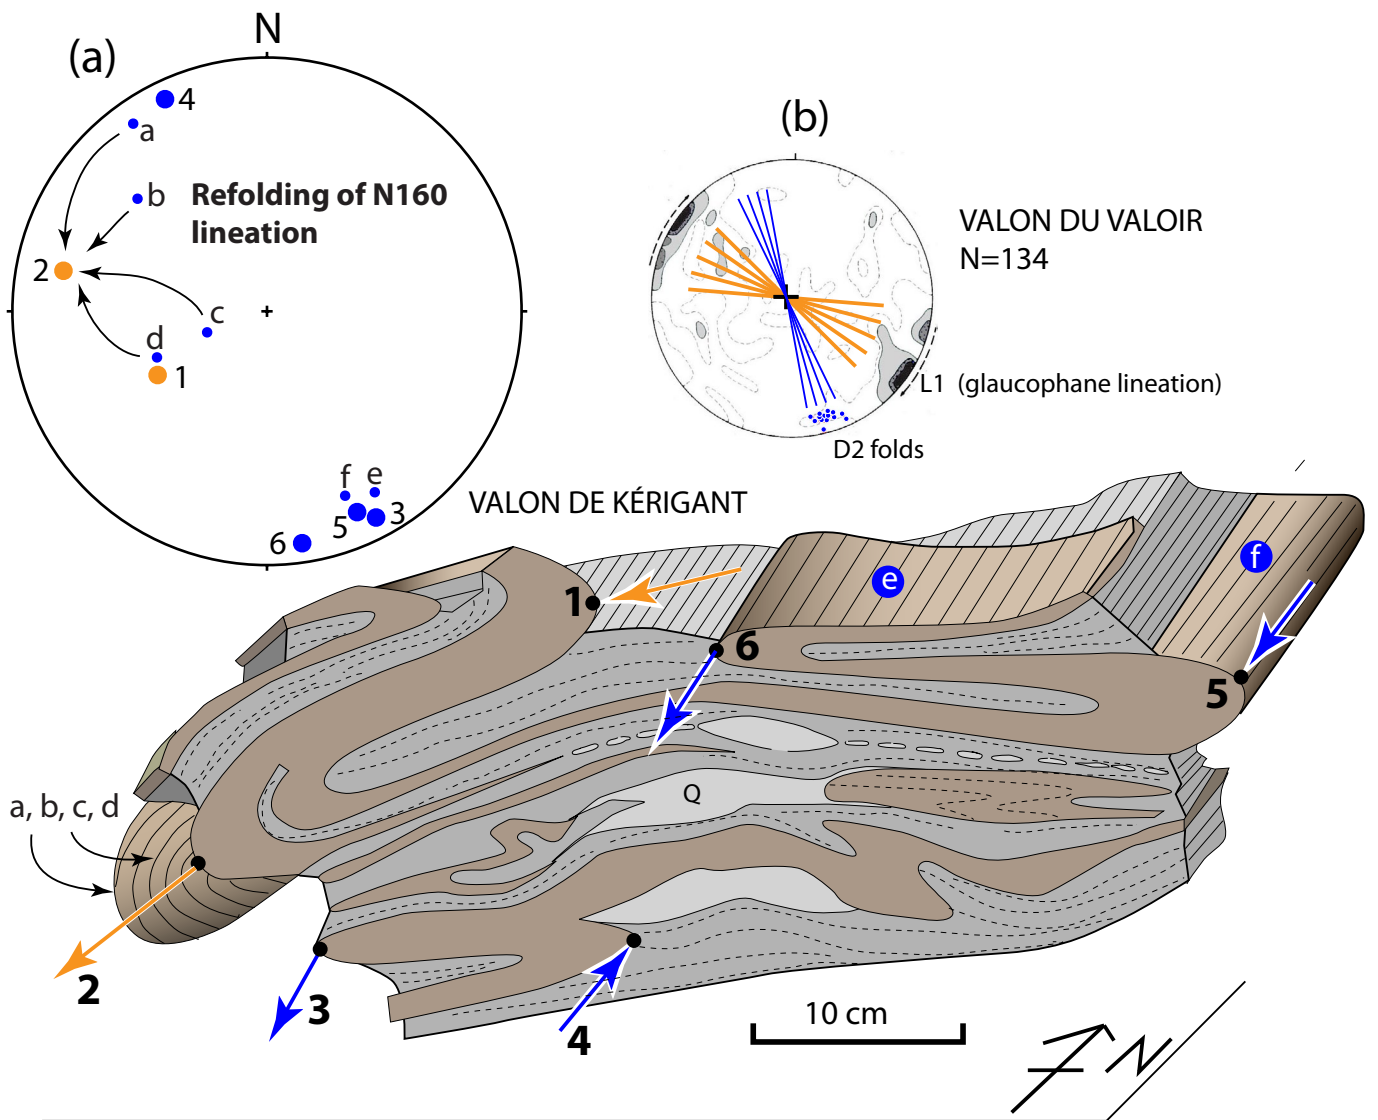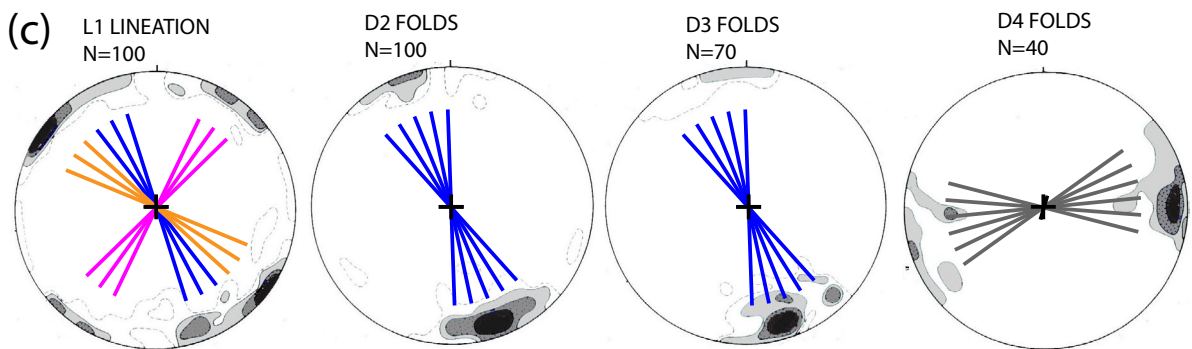

FIG. 9

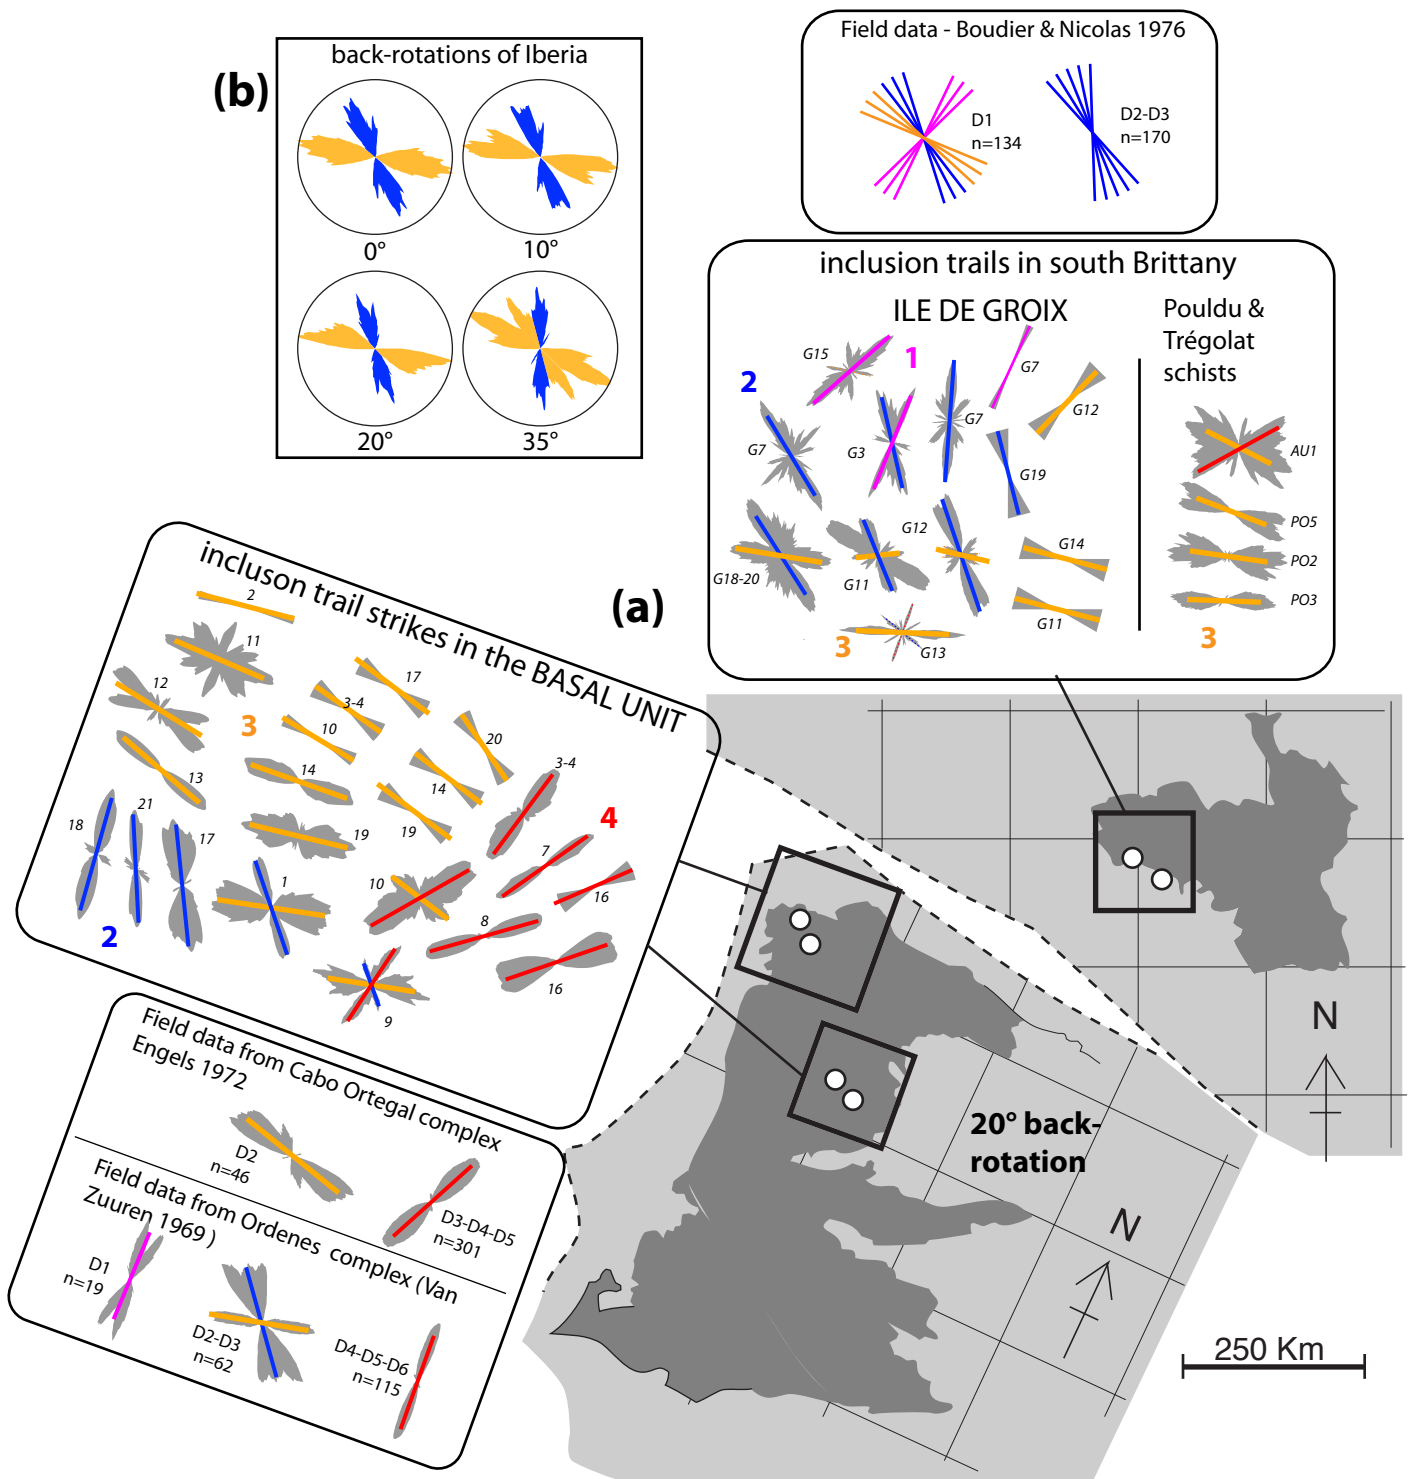

Fig. 10

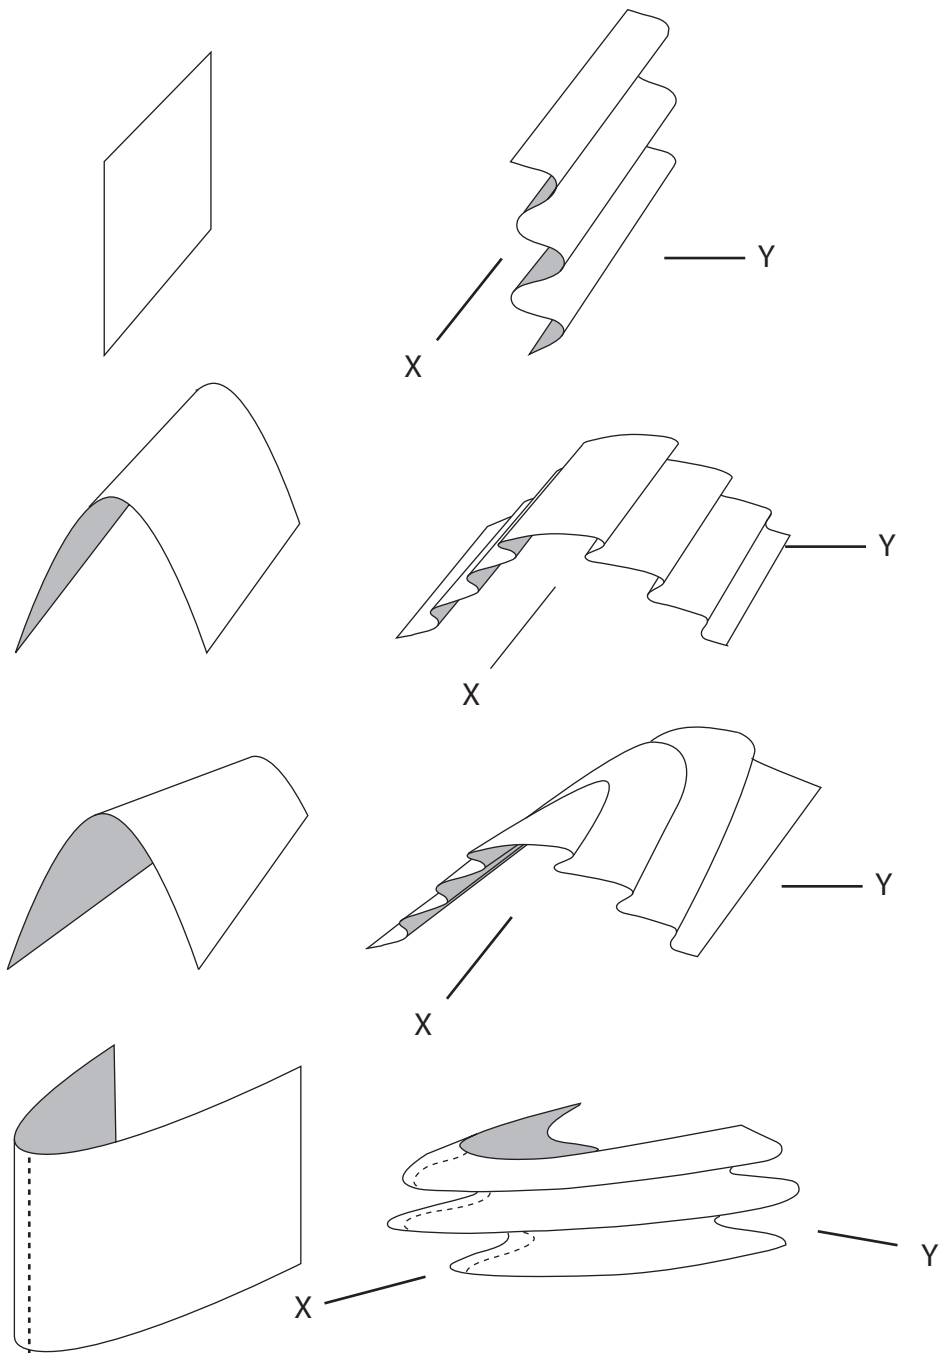

FIG. 11

**Code/Data availability**

All data are presented in the paper itself. No supplement is needed.

**Author contributions**

Aerden did the field work, conducted most of the research and wrote the manuscript

Sayab made and studied part of the thin sections.

Forde participated in part of the field work.

Ruiz-Fuentes studied part of the thin sections.

**Competing interests**

We have no competing interests
